# 1 **Time to Eat - A Personalized Circadian Eating Schedule** 2 **Leads to Weight Loss Without Calorie Restriction: A** 3 **Randomized Controlled Trial**

4 Isabell Wilming<sup>a</sup>, Jana Tuschewski<sup>a</sup>, Jessie M Osterhaus<sup>a</sup>, Theresa JG Bringmann<sup>a</sup>, Anisja  
5 Hühne-Landgraf<sup>a,b</sup> & Dominic Landgraf<sup>a,✉</sup>

6

7 <sup>a</sup>Circadian Biology Group, Department of Molecular Neurobiology, Clinic of Psychiatry and  
8 Psychotherapy, University Hospital, Ludwig Maximilian University, Munich, Germany

9 <sup>b</sup>Munich Medical Research School, Ludwig Maximilian University, Munich, Germany

10

11 ✉Dr. Dominic Landgraf  
12 Clinic of the University Munich  
13 Clinic for Psychiatry and Psychotherapy  
14 Nussbaumstr. 7  
15 80336 Munich  
16 Germany  
17 Tel.: +49 (0)89 4400 52753  
18 Fax: +49 (0)89 4400 54741  
19 E-Mail: dominic.landgraf@med.uni-muenchen.de

20

21

## 22 **Highlights:**

- 23 • Individual optimal times for meals are determined via an app-based meal diary.
- 24 • Generation of a structure plan for mealtimes are adjusted to individual circadian
- 25 clocks.
- 26 • Following this plan, participants lost an average body weight of 2.6 kg over six weeks.
- 27 • Weight loss is achieved without changes in self-reported food quantity or
- 28 composition.
- 29 • Regular mealtimes contribute to the improvement of the general well-being.
- 30

## 31 Abstract

32 *Objective:* Many weight loss strategies are based on the restriction of calories or certain  
33 foods. Here, we tested a weight loss intervention based solely on increasing the regularity of  
34 meals to allow the circadian system to optimally prepare food metabolism for these times.

35 *Participants & Methods:* In a two-group, single center randomized-controlled single-blind  
36 study (pre-registration DRKS00021419) with participants aged 18-65 years and BMI  $\geq 22$   
37 kg/m<sup>2</sup>, we used a smartphone application to identify the times at which each participant eats  
38 particularly frequently and asked participants of the experimental group to restrict their  
39 meals to only these times for six weeks. Control participants received sham treatment.  
40 Primary outcome was self-reported body weight/BMI and secondary outcome the well-being  
41 of participants.

42 *Results:* Of 148 participants entering the study, 121 were randomized and of these 100  
43 (control: 33, experimental: 67) finished the study. Our results show that the more regular the  
44 meals of participants of the experimental group became, the more weight/BMI they lost,  
45 averaging 2.62 kg (0.87 kg/m<sup>2</sup>);  $p < 0.0001$  (BMI:  $p < 0.0001$ ) compared to an insignificant  
46 weight loss of 0.56 kg (0.20 kg/m<sup>2</sup>) in the control group;  $p = 0.0918$  (BMI:  $p = 0.0658$ ).  
47 Strikingly, weight loss was not related to changes in self-reported calories, food composition,  
48 and other food-related factors. Additionally, physical and mental well-being improved  
49 significantly.

50 *Conclusion:* In summary, increasing the regularity of meals causes participants to lose excess  
51 body weight and improves overall well-being.

52

53

## 54 Key words:

55 Circadian Clock, Obesity, Overweight, Personalized Therapy, Mealtime Pattern, Mental  
56 Health, Weight Loss, Diet

57

58

## 59 Abbreviations:

60 CG = Control group; EG = Experimental group; IDS-SR = Self-Assessment Inventory of  
61 Depressive Symptoms; MCTQ = Munich Chronotype Questionnaire; MTVS = Meal time  
62 variability score; PSQI = Pittsburgh Sleep Quality Index; SF-36 = 36-Item Short Form Health  
63 Survey; SWE = Scale of General Expectations of Self-Efficacy

## 64 1. Introduction:

65 Circadian clocks induce endogenous 24-hour rhythms in the expression of more than half of  
 66 all genes across all tissues [1, 2], allowing the body to anticipate daily changes between day  
 67 and night and to prepare and harmonize physiological processes accordingly. However, this  
 68 requires exposure to very regular environmental time cues, so-called *Zeitgebers*, such as  
 69 food. Thus, on the one hand, the circadian system contributes to the optimization of food  
 70 metabolism; on the other hand, the intake of food serves as a potent *Zeitgeber*. Both mouse  
 71 and human studies have shown the negative consequences of circadian disturbances on  
 72 metabolism, body weight [3-11], and also mental health [12-14] and demonstrated that  
 73 restriction of meals to certain time spans of the day can counteract these harmful effects [15-  
 74 19]. However, previous human studies merely established rough periods during which  
 75 participants could still eat irregularly.

76 We expect that the success of previous interventions can be further improved by determining  
 77 each participant's eating time profile and creating a personalized meal plan accordingly, even  
 78 if participants continue to eat large meals.

79 Therefore, the primary aim is to individually determine and set optimal times for food intake  
 80 and to correlate the reduction of mealtime variability with alterations in body weight. For  
 81 control subjects, we specified a long 18-h window during which they could continue to eat  
 82 irregularly. We include participants of Body Mass Index (BMI) classifications normal to  
 83 extremely obese to test whether participants who exceed normal BMIs particularly benefit  
 84 from the intervention. Because of the impact of circadian clocks on other body functions, we  
 85 further hypothesize that regular food intake contributes to an overall improvement in well-  
 86 being, such as the subjective feeling of general health, sleep quality, affective state, and self-  
 87 efficacy. Since the program focuses on meal times and, unlike many other dietary programs,  
 88 explicitly does not aim to limit calories or certain types of food, we have named it "Time to  
 89 Eat" (Fig. S1A).

90

## 91 2. Results

### 92 2.1. Participants

93 A total of 148 participants were recruited. Of these, 121 were randomly allocated to the  
 94 experimental group (EG) (n=79) and the control group (CG) (n=42) (Fig. S1B), which had  
 95 non-significantly different mean BMIs of 25.9 (SD:  $\pm 4.138$ ) (CG) and 27.5 (SD:  $\pm 4.627$ )  
 96 (EG) (Tab. S1). At the end of the intervention (T2), data were available from 100 participants  
 97 (EG: n=67, CG: n=33). Their baseline data indicate that participants in both groups were, on  
 98 average, overweight according to BMI classification, with the included CG participants

having a BMI 25.5 (SD:  $\pm 3.827$ ) and being slightly less overweight, on average, than the analyzed EG participants with a BMI of 27.4 (SD:  $\pm 4.616$ ) (Tab. S1). There were no significant BMI differences between completers and drop-outs in either group (Fig. S2A, Tab. S2). Reasons for drop-outs were, according to self-report, illness/accident during the study and unwillingness or failure to adhere to fixed meal times.

## 2.2. Improvement of meal time regularity

All study participants were asked to record each caloric event during a 14-day exploration and a six-week intervention phase (Fig. 1A, B, S1C). During the exploration and intervention phases, a total of 13,838 and 34,564 caloric events were recorded from completers, respectively. Most EG participants were assessed as having three eating times ( $n=53$ ), some reported eating four meals ( $n=13$ ), and one had two main meals per day. The average MTVS for breakfast, lunch, dinner, and total meals of the exploration phase of both groups was around 4, which corresponds to a daily deviation of  $\sim 120$  min for each meal. In the EG group, mean scores improved to less than 2 during the intervention phase, corresponding to a mean deviation of less than  $\pm 30$  min (Fig. 1C, D, Tab. S3). In contrast, in the CG group, there was no improvement but some significant increase of the MTVS.

## 2.3. Weight change

During the exploration phase, when no instructions on eating times were given, CG and EG participants had a statistically non-significant average loss of 0.17 kg ( $0.06 \text{ kg/m}^2$ ) and 0.21 kg ( $0.06 \text{ kg/m}^2$ ), respectively (Figs. 1E, S2B-F, Tabs. S4, 5). However, during the intervention phase, when EG participants took their meals more regularly, they lost an average of about 2.6 kg (95% CI [-2.906, -1.915]) and  $0.81 \text{ kg/m}^2$  (95% CI [-0.9729, -0.6420]) (Figs. 1E, S2B-E, Tabs. S4, 5), which translates to an average weight loss of 0.40 kg ( $0.145 \text{ kg/m}^2$ ) per week during the intervention. In contrast, weight and BMI changes of -0.39 kg (95% CI [-0.9125, 0.1307]) and  $-0.14 \text{ kg/m}^2$  (95% CI [-0.3152, 0.0304]), respectively, were not significant in the CG (Figs. 1E, S2B, C, F, Tabs. S4, 5), resulting in a significant difference in weight loss between groups at the end of the intervention (Figs. 1F, S2C, Tab. S5). The inclusion of the last available weight and BMI data of the drop-outs in an end-point analysis did not lead to any notable change in this result (Fig. S2G, Tab. S5).

Four weeks after the intervention ended, all participants were contacted again for a follow-up assessment. 34 of the 67 EG participants reported to have maintained the regularity of their meals and continued to lose body weight significantly, on average another 1.12 kg (95% CI [-1.479, -0.7626]) and  $0.36 \text{ kg/m}^2$  (95% CI [-0.4907, -0.2457]), respectively (Figs. 1E, S2B, D, E, Tabs. S4, 5). In contrast, participants who reported to have resumed irregular eating gained a significant average of 0.48 kg (95% CI [0.1984, 0.7616]) and  $0.17 \text{ kg/m}^2$  (95% CI [0.07434, 0.2603]), respectively (Fig. 1E, S2B, D, E, Tab. S4).

#### 2.4. *Relation between weight change and improvement in the regularity of meals*

To examine the extent to which EG participants' weight loss was effectively related to improvements in meal regularity, we correlated changes in body weight and BMI with individual MTVS changes. Consistent with our hypothesis, a significant relationship exists between weight loss and improvement in regularity in the EG (Fig. 1G, Tab. S6). A breakdown of meals shows that increasing the regularity of lunch and dinner has the greatest effects, with no significant relationship between increasing the regularity of breakfast and weight loss (Fig. S2H, Tab. S6). In contrast, in the CG, there were no or little improvements in regularity and, accordingly, no correlation with weight/BMI changes.

Further analyses revealed that all MTVS up to 3, which corresponds to a time window for meals of up to  $\pm 45$  min, resulted in comparably effective weight loss, whereas the efficiency of weight loss decreases significantly with an MTVS greater than 3 (Tab. S7).

#### 2.5. *Relation between weight change and baseline BMI*

A weight loss intervention which is particularly based on metabolic optimization is likely to be most effective for individuals with exceeded body weight. In fact, the higher the baseline BMI of EG participants at T1, the greater the weight loss (Fig. S2I, Tab. S6). Stratifying the subjects by baseline BMI, including the control group, confirms this result, but also shows that in all strata the BMI of EG subjects decreased more than that of CG subjects, even if they had the same initial BMI (Fig. S2J, Tab. S8). Multiple regression shows that the reduction in MTVS and baseline BMI together predict the weight loss of the participants (Fig. 1H, Tab. S9). These data show that regularity in meal intake can lead to a significant loss of body weight and suggest that this effect is especially pronounced in individuals with a higher BMI.

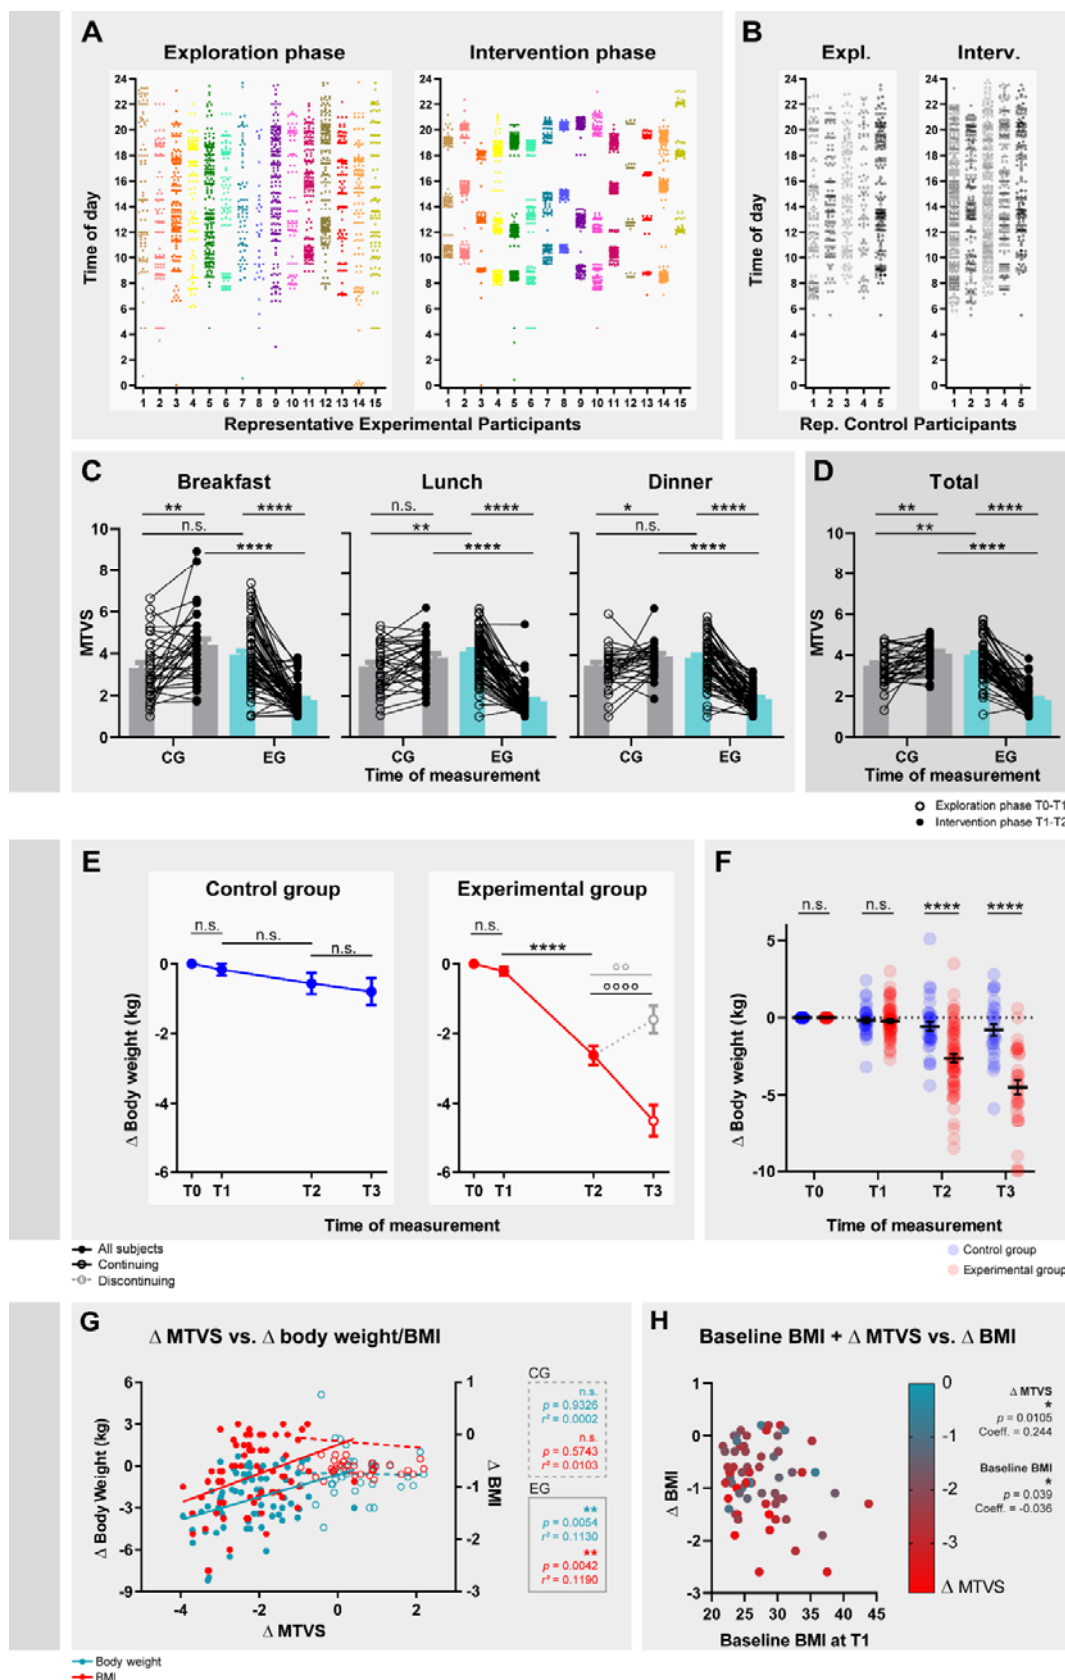

Fig. 1: Improvement in regularity of meals, body weight changes, and correlation between loss of body weight and regularity of eating meals. (A, B) Times of day of caloric events of

15 representative participants of the EG (A) and the CG (B) during the two-week exploration phase (left) and the six-week intervention phase (right). Each point represents a caloric event. (C, D) Change in MTVS of participants in the CG (gray) and EG (cyan) of breakfast, lunch, and dinner (C) and of all meals combined (D), including snacks, if snacks were taken. 2-way repeated-measures ANOVA with Bonferroni post hoc test comparing CG and EG during the exploration or intervention phase and To-T1 and T1-T2 within groups, \*  $p \leq 0.05$ , \*\*  $p \leq 0.01$ , \*\*\*\*  $p \leq 0.0001$ . CG: n=33; EG: n=64-67, missing n-values in the EG are due to the different number of meals for each participant. Detailed statistics in Tables S3. (E) Within group differences of body weight during the study. Body weight was collected at different time points, at the beginning of the study (To), after the exploration phase (T1), after the intervention phase (T2), and after the follow-up phase (T3). During the follow-up phase, 34 EG participants voluntarily continued the intervention (continuing; black line and open circle) while 33 participants no longer followed the intervention (discontinuing; gray, dashed line and open circle). Only three control subjects continued their intervention in the follow-up phase, which is why a division into continuing and discontinuing was omitted in this group. Data are normalized so that all baseline data at To equals 0 to represent change. Differences of all CG and EG participants between To, T1, and T2 were calculated with a 1-way ANOVA, as were differences between T2 and T3 of CG participants (Bonferroni post-hoc test, \*\*\*\*  $p \leq 0.0001$ ). Differences between T2 and T3 of continuing and discontinuing EG participants were calculated with a paired t-test °°  $p \leq 0.01$ , °°°°  $p \leq 0.0001$ . Detailed statistics in Table S4. (F) Between group differences of BMI from To-T3. Mixed-effect model with Bonferroni post-hoc test comparing CG and EG at different phases during the study, \*\*\*\*  $p \leq 0.0001$ . Detailed statistics in Table S5. (G) Significant correlation between body weight/BMI and MTVS. The more participants improved their regularity of meals (decreasing MTVS), the more weight/BMI they lost. Linear regression, CG: n=33; EG: n=67, \*\*  $p \leq 0.01$ . Detailed statistics in Tab. S6. (H) Significant correlation between change in BMI, baseline BMI, and improvement in MTVS. Individuals with higher BMI benefit more from similar improvements in MTVS (shades of data points) than individuals with lower BMI in EG participants. Multiple regression, n=67, \*  $p \leq 0.05$ , \*\*  $p \leq 0.01$ . Detailed statistics in Tab. S9.

## 2.6. Relation between weight change and self-reported food quantity and composition

By restricting meals to specific times and shortening the time window in which food is eaten, it is feasible that EG participants ate less or changed food composition during the intervention phase and therefore lost weight. However, on average, the reported food energy ingested by CG and EG participants did not substantially change during the study (Fig. 2A, S2K, L, Tab. S3, 6), apart from a minor average reduction of ~350 kJ (95% CI [-627.6, -



67.67]) per day in the EG (Fig. S2K, Tab. S3, 6), and did not differ between CG and the EG. As they are rather small, these differences do not add up to a significant reduction in the total average energy consumed over the course of the study. Accordingly, the determined cumulative average energy intake during the intervention phase did not differ on any day from the estimated energy intake based on an extrapolation of the cumulative food consumption during the exploration phase, neither in the CG nor in the EC group (Fig. 2B). Nevertheless, there were some participants who reported having consumed fewer calories during the intervention phase, while some also reported having ingested more calories. However, consistent with our hypothesis that high regularity of mealtimes optimizes metabolism of similar amounts of food, there is no relationship between reported changes in average daily and cumulative energy intake and change in body weight/BMI of either CG or EG participants (Fig. 2C, D, Tab. S6). Likewise, the composition of the ingested foods did not change considerably in either group, and participants reported a normal distribution of the macronutrients of fat, carbohydrate, and protein in both phases of the study (Fig. 2E, S2M). Also, there was no correlation between weight change and change in reported average daily and cumulative macronutrient intake (Fig. 2D, S2N, Tab. S6).

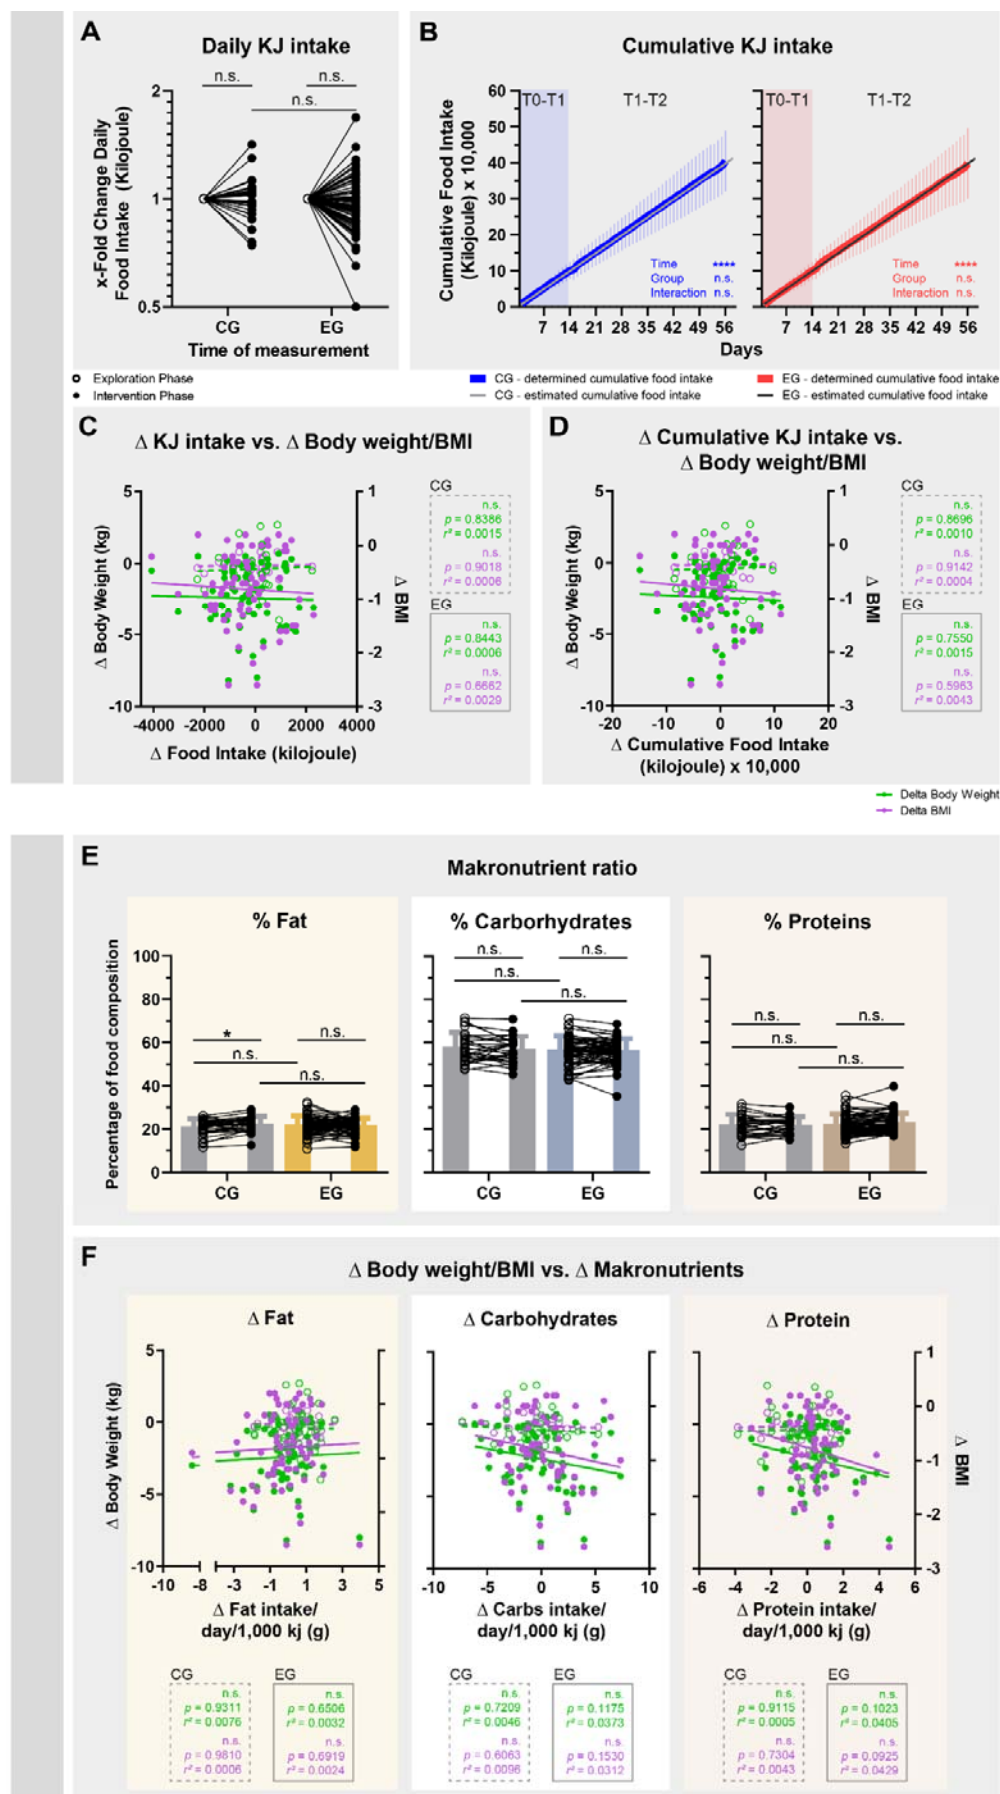

*Fig. 2: Changes in body weight/BMI are not related to changes in reported caloric intake and composition of macronutrients. Changes in reported daily caloric intake (A), cumulative caloric intake (B) and food composition (E) and their relationship to weight/BMI changes (C, D, and F). Data in (A) are normalized so that all baseline data of the exploration phase equal 1. To represent the x-fold change, data from the intervention phase are divided by data from the exploration phase of the corresponding participant. (A, E) 2-way repeated-measures ANOVA with Bonferroni post hoc test comparing CG and EG during the exploration or intervention phase and T0-T1 and T1-T2 within groups, \*  $p \leq 0.05$ . Detailed statistics in Tables S3. (B) Mixed-effects model with Bonferroni post hoc test comparing determined and estimated cumulative energy intake. The estimated energy intake is formed as an assumed continuation of the average daily intake during the exploration phase. The Bonferroni post hoc test showed no significant differences on any study day. (C, D, and F) Linear regression, CG:  $n=30$ ; EG:  $n=67$  (some participants were excluded subsequently from this analysis because of several erroneous diary entries about unrealistic amounts of food, e.g., 30,000 g chicken for lunch). Detailed statistics in Tab. S6.*

## 2.7. Relation between weight change and other meal timing-related factors

Besides increasing regularity, restricting meals to certain times of the day can also shorten the daily window in which meals are eaten and shift meals to other times of the day. In fact, our intervention caused many EG participants to avoid occasional meals at extremely early or late times, limiting their meals to much shorter intervals of 11 h (95% CI [10.468, 11.520]) (Fig. 3A, B, Tab. S3), while those of the CG remained long with 13.7 h (95% CI [12.902, 14.562]). Additionally, compared with before and with the CG, the EG intervention resulted in the first meal of the day being delayed to a later time for many subjects (EG: 09:21 (95% CI [08:58, 09:45]) vs. CG: 08:03 (95% CI [07:32, 08:33])) and the last meal of the day being advanced to an earlier time (EG: 20:17 (95% CI [19:59, 20:35]) vs. CG: 21:31 (95% CI [21:05, 21:57])) (Fig. 3C, D, Tab. S3). However, weight changes of participants were not related to one of these changes in eating characteristics (Fig. 3B-D, Tab. S6).

## 2.8. Effect of meal schedule personalization on weight loss

A key part of our hypothesis involves the personalization of meal schedules. Consistent with the concept of social jet lag, our data show that during the exploration phase, eating times on workdays differ from those on work-free days, and we expect eating times on non-workdays to correspond more closely to individual circadian characteristics. Indeed, our data show that the later the chronotype of participants (measured by the MCTQ mid-sleep phase, mSP [24]), the later their mid-eat phase (mEP) on weekends (Fig. 3E, Tab. S6), with the mSP and mEP being almost antiphasic on average (Fig. 3F, Tab. S10). The EG intervention maintains most

of this relationship. However, the residuals of the regression become smaller, resulting in a model fitting the data better (Fig. 3E, Tab. S6). Interestingly, the closer the intervention brought participants' observed values to their individual fitted values, i.e., the smaller the residuals became, the more weight they lost (Fig. 3G, Tab. S6). From a clinical point of view, this indicates that a personalized adjustment of eating times to the individual chronotype, i.e., the establishment of a highly accurate phase relation between mEP and mSP, leads to a particularly effective reduction of excess weight.

The calculation of individual eating times was based on the frequency of hours at which meals were eaten during the exploration phase, which typically included more workdays than non-workdays (Fig. 3H). Consequently, for some subjects, the EG intervention created a discrepancy between what may have been physiologically optimal eating times, reflected by weekend data, and the calculated eating times (Fig. 3I, Tab. S11). However, the magnitude of this discrepancy has no effect on weight changes (Fig. S2O, Tab. S6). On the contrary, if the calculated eating times resulted in large shifts of the weekend meals, this also means that previously particularly large "meal jet lags" between working and non-working days were eliminated. Indeed, the more the calculated eating times led to an advance of the first meal and a delay of the last meal, thus the greater the effect of the "meal jet lag" elimination was, the more the participants lost weight (Fig. 3J, Tab. S6). Interestingly, this also includes the elimination of too early dinners on work days. Our data show that a later dinner on all days of the week can lead to weight loss if this time corresponds to the calculated individual optimal time.

The independent variables used above for simple regressions may influence each other and therefore their influence on BMI may be confounded. Therefore, a multiple regression with the most important and least multicollinear variables ( $\Delta$ MTVS,  $\Delta$ kJ,  $\Delta$ calorie intake interval,  $\Delta$ mSP-mEP relation,  $\Delta$ weekend breakfast,  $\Delta$ weekend dinner) was done to study their individual influences on the BMI of EG participants while keeping the other variables constant. According to this analysis, only the change in MTVS and also the resulting elimination of "dinner jet lags" have significant influence on the BMI (Fig. 3K, Tab. S9). The elimination of "breakfast jet lags" and the improvement of the mSP-mEP ratio did not reach significance but showed a strong tendency to influence BMI. Changes in caloric intake or the time interval during which food is consumed had no effect on the BMI. A concurrent analysis of covariance shows that MTVS is most strongly intertwined with BMI, while other variables play a role to a much lesser extent (Fig. 3L).

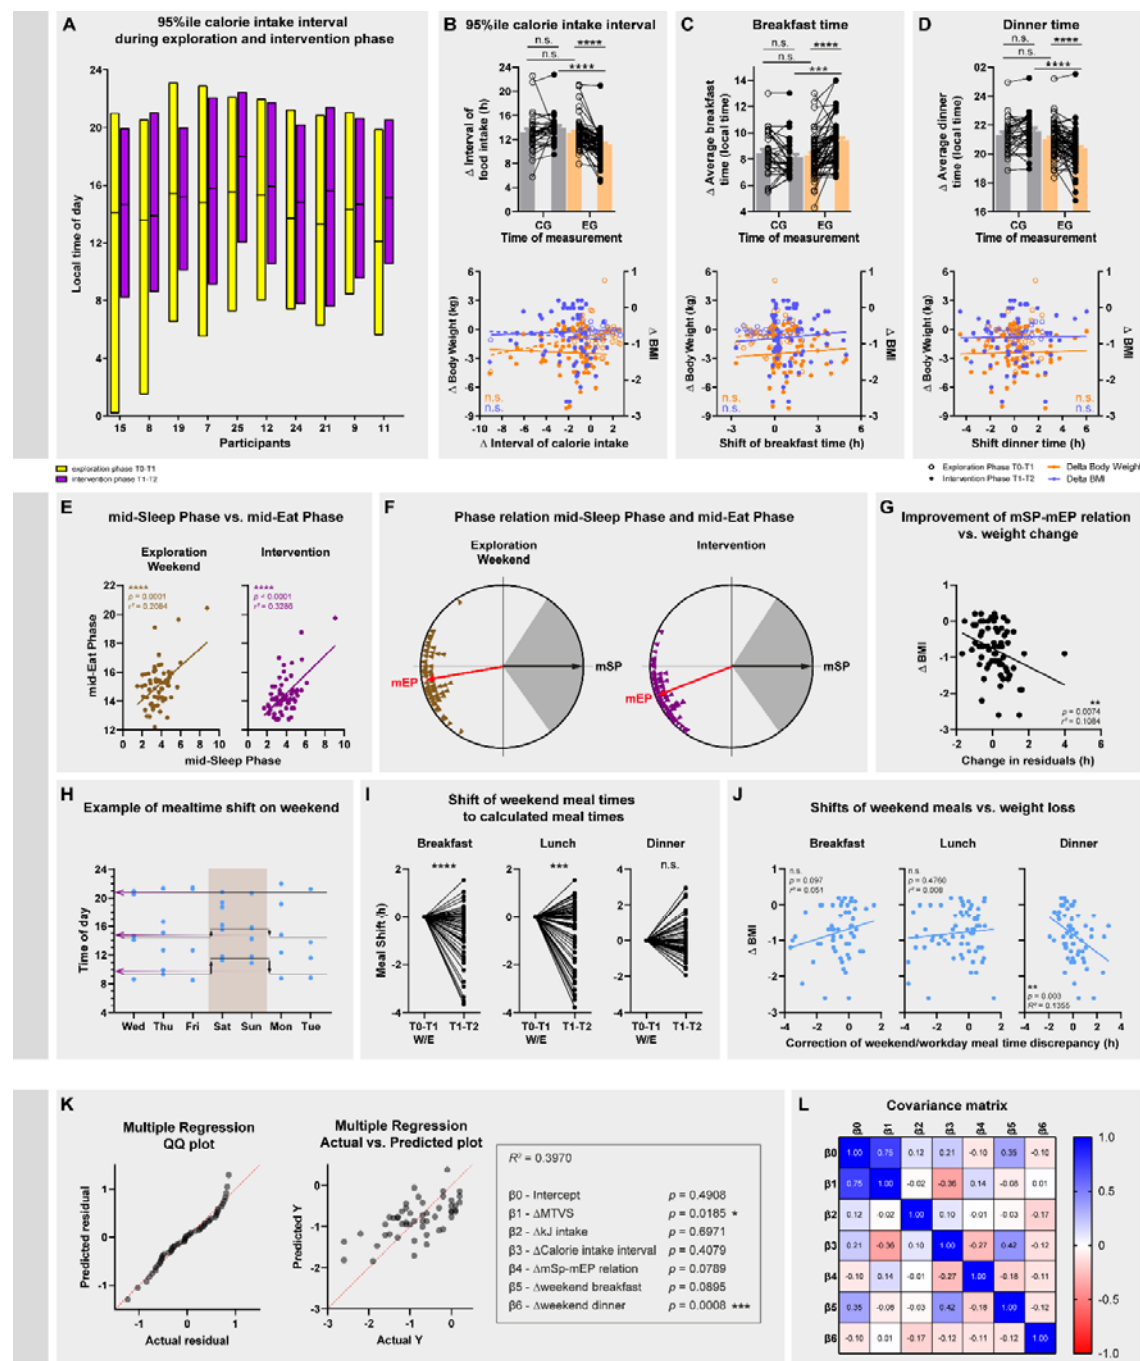

Fig. 3: Influence of other changes in eating times and of personalization of meal schedules on weight loss. (A) 95th percentile of the time period during which food was ingested by 15 example participants during the exploration phase (yellow) and the intervention phase (purple). (B) Change in length of this period and its relation to weight/BMI changes. (C, D) Change in time of first (C) and last (D) caloric intake and their association with weight/BMI changes. (B-D) 2-way repeated-measures ANOVA with Bonferroni post hoc test comparing CG and EG during the exploration or intervention phase and T0-T1 and T1-T2 within groups, \*\*\*  $p \leq 0.001$ , \*\*\*\*  $p \leq 0.0001$ . Linear regression. EG:  $n=67$ , varying  $n$ -numbers result from incomplete entries in the diaries. Detailed statistics in Tables S3 and

S6. (E) The relation between mid-Sleep phase and mid-Eat phase (brown) on the weekends of the exploration phase. The goodness of fit of this association improves during through EG intervention and affects both workdays and weekend days (purple). Linear regression,  $n=65$ , \*\*\*\*  $p \leq 0.0001$ . Detailed statistics in Table S6. (F) Relation of the mid-Sleep phase (mSP) and mid-Eat phase (mEP) during exploration and intervention phase. The circles represent 24 h, the gray area represents the estimated sleep time, and the black arrow represents the mid-sleep phase, which is normalized for all subjects. The colored triangles represent the mid-Eat phase of each subject in relation to their mid-Sleep phase. The red arrow shows the average mid-Eat phase across all subjects.  $n=65$ . Detailed statistics in Table S10. (G) The smaller the residuals, i.e., the vertical distances of observation points from the regression line, became, the more BMI the EG subjects lost. Linear regression,  $n=65$ , \*\*  $p \leq 0.01$ . Detailed statistics in Table S6. (H) Representative example of a meal diary showing a shift from meals on weekends. The purple arrows represent the calculated times, based on the events of the more frequent workdays, for the meal schedule of the intervention phase. (I) Shifts from weekend meals caused by the EG intervention. Paired t-test,  $n=65$ , \*\*\*  $p \leq 0.001$ , \*\*\*\*  $p \leq 0.0001$ . Data are normalized so that all baseline data at To-T1 equal 0 to represent the change in hours. Detailed statistics in Table S11. (J) Large phase shifts of breakfast and dinner, equivalent to a correction of the social jetlag of meals on weekends, are related to greater weight loss. Linear regression, breakfast:  $n=55$ , lunch:  $n=64$ , dinner:  $n=63$ , \*\*  $p \leq 0.01$ . Missing n-numbers are due to incomplete diary entries on weekends during the exploratory phase or because participants usually did not have a particular meal. Detailed statistics in Table S6. (K) Results of a multiple regression to investigate the influence of individual variables while holding the others constant on the BMI of EG participants. The Quantile-Quantile (QQ) plot shows the data are normally distributed (left). The multiple regression plot and  $R^2$  value shows that the multiple regression model explains the data well (middle). Additionally, the assignment of each regression beta coefficient to the independent variables is shown along with the p-values showing the influence on BMI. The data used are the same as those used in the individual regressions shown previously. Detailed statistics in Tab. S9. (L) Covariance matrix with normalized covariances for each pair of parameters. Values close to 1 (blue) or -1 (red) indicate high intertwining of the data, values close to 0 (white) indicate independence or orthogonality of the data. The assignment of the coefficients to the independent variables is the same as in (K).

## 2.9. General well-being outcomes

Since stable circadian rhythms are generally associated with many aspects of health, regular entrainment of a variety of peripheral and brain clocks by the *Zeitgeber* food may enhance

overall well-being. To test this, participants were asked to complete clinical questionnaires measuring subjective health status, sleep quality, depressed mood, and self-efficacy at To and at T2. In addition, chronotype was also determined. Many aspects of subjective physical well-being (SF-36 - physical health items) improved significantly during the intervention in the EG (Fig. 4A, Tab. S3), reversing previous differences between CG and EG. In contrast, there was only a slight improvement in the general health item within the CG. In addition, sleep quality (PSQI) of the EG group improved significantly during the intervention, but not of the CG group, again eliminating prior differences between CG and EG. Furthermore, mental health, including vitality, depressed mood, and self-efficacy (SF-36 mental health items, IDS-SR, SWE) also improved significantly in EG participants, but not in the CG (Fig. 4A, Tab. S3). Consistent with our aim to optimize rather than to change individual rhythms, chronotype did not change during the study (Fig. 4B, Tab. S3).



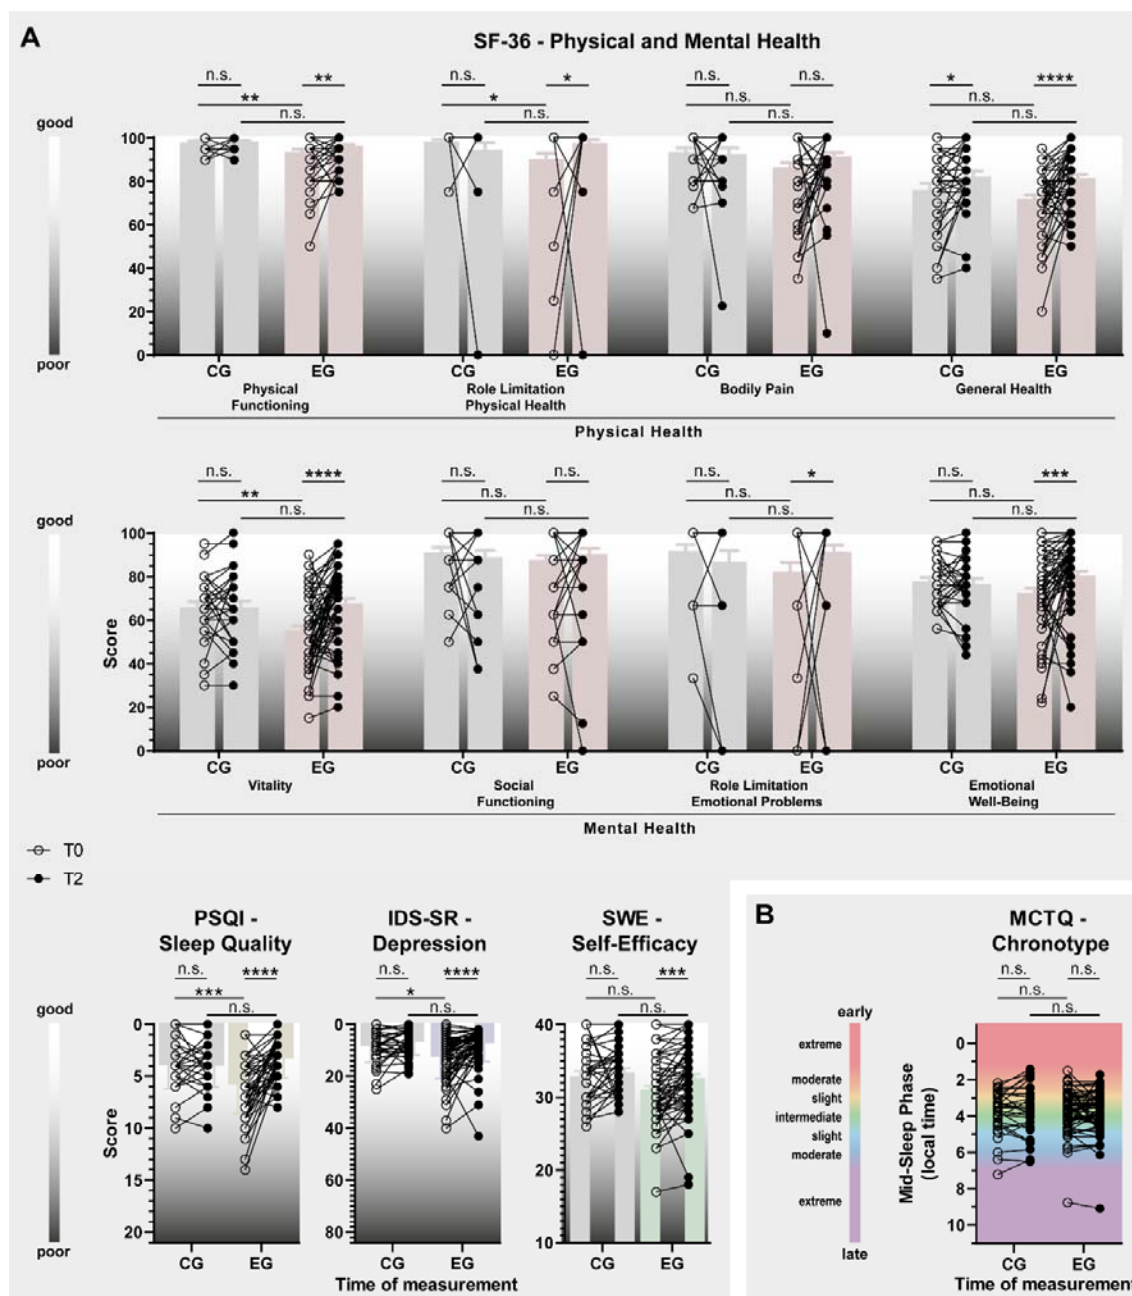

Fig. 4: Improvement in overall well-being over the course of the study. (A) Significant improvements are observed in various aspects of physical and mental health (SF-36), sleep quality (PSQI), depressed mood (IDS-SR), and self-efficacy (SWE) in participants of the EG (colored columns), but hardly among CG participants (gray columns). Scales are either upward or downward, depending on whether low or high scores on the questionnaires mean subjectively good or poor well-being. (B) The chronotype of EG and CG participants did not change during the study. 2-way repeated-measures ANOVA with Bonferroni post hoc test comparing CG and EG during the exploration or intervention phase and T0-T1 and T1-T2 within groups, \*  $p \leq 0.05$ , \*\*  $p \leq 0.01$ , \*\*\*  $p \leq 0.001$ , \*\*\*\*  $p \leq 0.0001$ . CG:  $n=33$ ; EG:  $n=67$ . Detailed statistics in Tab. S3.



### 3. Discussion

In our study, we show that increased regularity of the *Zeitgeber* food can lead to a significant reduction in body weight. Although the diary entries of some participants show that they changed their energy intake and also the food composition of fat, carbohydrates and proteins during the study, the observed weight loss is not related to these changes.

Related results have already been shown in mice, although here with a restriction to the entire active phase rather than specific eating times. Not surprisingly, mice gain weight and develop diabetes-like states under a high-fat diet [17]. It is surprising, however, that the negative physiological consequences of the high-fat diet can be almost completely prevented if the mice consume the equivalent amounts of high-fat food exclusively during their activity phase and do not receive any food during their sleep phase [17, 25].

In our study, an increase in the regularity of lunch, and somewhat more strongly that of dinner, is related to weight loss, which to some extent contrasts with previously published data in which increased regularity of breakfast in particular, and not so much that of dinner, was identified as a predictor of weight loss [26]. Besides increased regularity, our intervention has additional effects on eating behavior, such as shortening the hours in which food is eaten, which in our study is not related to weight loss. This is similar to the principle of 16:8 intermitted fasting or time-restricted eating (TRE), in which meals are taken only specific time window, yet at unspecified times during that period. The effects of these protocols is mixed and often less pronounced, as less [21, 23, 27] weight loss or a longer period is required to achieve similar results [22] than in our study - with the caveat that more overweight and older participants participated in these studies than in ours. However, other studies have also explored the effect of restricting individual meals to specific times. In mice, restricting the same amount of high-fat chow to two times per day reduces the development of obesity [28]. And in humans, restricting meals to three fixed, uniform times leads to similar weight loss like we observed in our study - but in combination with calorie reduction and standardized food [29].

The fact that our participants lost weight to a similar extent despite free choice of meals could be due to the individual tailoring of meal schedules. It is true that our data show that scheduling single meals to supposedly circadian optimal eating times of the participants is not essential for successful weight loss. Circadian clocks can flexibly adjust to *Zeitgebers* and it is apparently more important to choose a time when individuals (have to) eat particularly frequently than the exact genetically determined eating time. However, our data still show that personalization of meal schedules is nevertheless useful. First, depending on the individual chronotype of the participants, their mealtime windows were earlier or later in the day. And those for whom the intervention optimized this relationship were particularly

effective at losing excess weight. Second, if the schedule is designed to prevent large jumps between meals, especially dinner, on workdays and work-free days, weight loss is more successful.

Since food serves as a *Zeitgeber* for a large number of tissues, including several brain regions, it can be hypothesized that regular eating not only has a positive effect on body weight, but also on other aspects of well-being. A previous study by Panda et al. [18] has already shown that shortening the eating interval to 10-12 hours per day has a positive effect on the general well-being of the participants. Similarly, in our study, we also found significant improvements in different aspects of subjective well-being over the course of the study, specifically in physical and mental health, sleep quality, and self-efficacy. This shows that adhering to daily structured mealtimes can improve not only metabolic but also other physical and also psychological levels of health.

There are several explanatory approaches for why increased meal regularity can lead to weight loss despite equal caloric intake. For example, circadian clocks influence the composition of the microbiome, which regulates metabolic balance and body weight [30-34]. Additionally, circadian clocks help to anticipate mealtimes and provide the necessary digestive components in advance of food intake in advance [35-38]. Accordingly, the number of rhythmic genes in the liver of mice increases from ~350 to ~3,000 when the animals can follow their natural feeding rhythm and even to ~5,000 when the feeding time is restricted to a certain period of time [39].

### 3.1. Limitations

However, in our study, we did not collect metabolic parameters that could provide mechanistic explanations for the observed weight loss. Therefore, the assumption of an optimized metabolism remains speculation. Another limitation of the study is the self-assessment of key data on body weight, eating times, and food composition. Body weight could not be collected in our clinic under supervision because of the Covid-19 pandemic. Regarding food intake, some participants underreported during the study, as indicated by unrealistically low kJ intakes. However, the individual reporting behavior of each participant remained largely the same during the exploration and intervention phases, so underreporting is not indicative of a change in eating behavior and, conversely, the observed kJ differences are likely due to actual changes in eating behavior. In addition, in the remaining evaluable 100 study participants, there was a significant difference in baseline body weight and BMI between CG and EG. However, even if CG participants had been heavier from the start, it cannot be assumed that the applied sham treatment with an eating window of 18 hours during wake time would have had a stronger effect. Second, those subjects in the EG group whose baseline BMI was similar to those of the CG subjects lost significant weight during the intervention, while CG participants did not. Taking these two arguments into account, it

cannot be assumed that a floor effect, in which the CG participants cannot lose any more weight due to a lower baseline weight, is the reason for the lack of weight loss in the CG. Lastly, studies show that even much larger baseline BMI differences do hardly affect the success of weight loss programs [40, 41], so we assume that this also applies to our study. During the course of the study, there were some drop-outs in both groups. Importantly, these did not differ in baseline weight from the completers, which is why it can be ruled out that the intervention was not effective in a particular BMI group. Rather, the subjects who dropped out were those who either could not continue due to illness or did not adhere to the meal plan. However, the inclusion of drop-outs in the analysis of weight progression does not fundamentally change the results.

### 3.2. Conclusion

In summary, our data show that the increase of regularity of meals to a period of 90 min for each meal promotes a significant reduction of body weight and a significant increase of well-being within short time. Importantly, the successes achieved do not seem to be related to a reduction in calories, a change in food composition, or other eating behaviors. Additionally, we believe that this intervention poses hardly any health risks since it is most likely solely based on the optimization of metabolic processes. On the contrary, the strong increase in general well-being during the study rather indicates an improvement in health on many different levels.

## 4. Methods

### 4.1. Experimental approach

The study was a randomized controlled intervention trial with repeated measures investigating the effect of regularity of mealtimes on body weight and parameters related to overall well-being. Participants were blinded to the group assignment in that both control and experimental subjects were equally informed to participate in an intervention. The study was carried out at the Clinic for Psychiatry and Psychotherapy of the Ludwig Maximilian University (LMU), Munich, Germany. The study is registered at the German Clinical Trial Register with the trial number DRKS00021419 and was approved by the Ethics Committee of the LMU.

### 4.2. Participants

The participants were recruited across Germany via flyers at universities, fitness studios, adult education centers, pharmacies, grocery stores, and via Facebook® between September 2020 and August 2021. Those interested were able to contact the study staff by phone, email, or by making an entry in an online calendar tool. Participants had to be between 18-65 years

old and have a BMI  $\geq 22$  kg/m<sup>2</sup>. A requirement for participation in the study was that no other diet was concurrently followed, and that no medication was being taken regularly that could influence appetite or weight. No participants were included who knowingly suffer from a metabolic, mental, or addictive disorder. Further exclusion criteria were pregnancy, blindness, bedriddenness, and dependence on assistance with eating. Special emphasis was placed on the participants' ability to understand the details of the study and to give written consent to participate.

### 4.3. Study Protocol

Each participant completed a 12-week program, which consisted of the following steps (Fig. S1C):

#### 4.3.1. Introductory Session and Initial Questionnaire Assessment

At the introductory session, the eligibility for possible participation in the study was determined and demographic data was collected. Then, suitable participants received a general introduction to the study, which included the theoretical background of the study and a detailed explanation of the study procedure. Subsequently, the participants were informed about their rights, the voluntary nature of their participation in the study, and data protection regulations. All participants had to sign an informed consent form for study participation and for the recording and use of their data. Participants weighed and measured their height themselves while study staff connected with them online via camera. Afterwards, the participant received questionnaires to fill out. This initial data assessment is referred to as T<sub>0</sub> in the analysis.

#### 4.3.2. Two-Week Exploration Phase

The introduction was followed by a two-week exploration phase in which the participants were asked to follow their usual eating habits and to document all caloric events (main meals, snacks, caloric drinks) using the smartphone application "FDDB" as accurately as possible. Based on this data, the personalized nutritional schedule was then developed. Data from the FDDB smartphone application also allowed us to calculate individual caloric intake along with the ratio of consumed macronutrients for each day during the study. Additionally, the participants weight was measured again. The end of the exploration phase is called T<sub>1</sub> in the analysis.

#### 4.3.3. Six-Week Intervention Phase

*Experimental Group (EG):* Following the exploration phase, the participants received their personalized mealtime schedule, which was prepared beforehand by the study staff based on the meal diary of the exploration phase. Together with the participants, the nutritional behavior of the last two weeks was reviewed and analyzed. Special attention was paid to

irregularities in mealtimes and to times of day when food was eaten particularly frequently. In this way, participants were made aware that they eat irregularly, but that there are nevertheless times when their internal clock frequently triggers hunger. This was followed by a six-week intervention phase, in which the participants were instructed to have their meals only at times according to the mealtime schedule. Participants were explicitly told that they were not restricted in their choice and quantity of food. During the intervention phase, participants should continue to document all caloric events using the Fddb App. In addition, participants were asked to weigh themselves weekly to measure their progress. Halfway through the intervention phase, participants were contacted at least once by telephone to clarify possible questions and maintain compliance. Further, in case participants stopped making entries in their Fddb diary for two or more days, they were contacted to ask for reasons and to reinstate compliance again.

*Control Group (CG):* In principle, participants in the CG followed the same procedure. However, they were given a sham treatment, for which they were asked to restrict their meals to a freely chosen 18-hour time window per day, during which they could eat what they wanted and, above all, when they wanted. It can be assumed that restricting the eating time window to 18 hours should have no effect on weight, since such a long eating time window is hardly ever exceeded by most people anyway [18] and therefore hardly any change in eating behavior is to be expected.

#### 4.3.4. Final Questionnaire Assessment

At the end of the intervention phase, the participants were asked to fill out the same questionnaires as at the introduction session. Additionally, weight was measured again. This data assessment is called T2 in the analysis.

#### 4.3.5. Follow-up Assessment

Four weeks after completion of the study, the study staff contacted the participants again by telephone to inquire about their current weight and to obtain information about whether the participants had voluntarily continued the program after the end of the intervention phase. If the participants indicated that they did not continue the program, possible reasons were evaluated, and suggestions were received on how the current protocol could be improved to make it more attractive for permanent implementation in everyday life. Participants of the control group were informed at this point about their allocation and the actual question of the study. The final data assessment is called T3.

#### 4.3.6. Restrictions due to the Covid-19 pandemic

Due to restrictions imposed by Covid-19, the study was carried out online. Data collection and communication was exclusively done via email, Zoom Meetings (Zoom Video Communications, Inc.), Facebook (Meta Platforms), or telephone.

#### 4.4. *Assessment of General Well-Being*

To measure whether restricting meals to times when we believe the circadian system triggers hunger leads to an increase in general well-being, questionnaires were collected to measure sleep quality, physical well-being, self-efficacy, and depressive mood. Additionally, the chronotype was assessed (Tab. S12).

#### 4.5. *Mealtime Diary with FDDb Application*

The nutrition diary of the smartphone application FDDb was used to document all caloric events. FDDb is freely available in the usual application stores and is operated by the independent food industry company FDDb Internetportale GmbH, Berlin. Users can record each caloric event with detailed information about the amount, type, and method of preparation of each food, which can be selected from a large database of different foods, which also contains data about the energy value of each product. The app automatically records the date and time of each caloric event. In case a certain food is not listed in the database, placeholder events with estimated energy values can be recorded. In addition to the participants, the study staff also had access to each account to check compliance and regularly download diary data.

#### 4.6. *Creation of Personal Meal Schedules*

At the end of the exploration phase, FDDb data were downloaded, and clusters of times of meals were identified. First, for each participant the optimal number of mealtime clusters was determined by the heuristic technique *elbow method*. With the number of meals calculated in this way, the optimal times for each of these meals were then calculated using the *k-means* algorithm with the scikit-learn machine learning package for Python. The variable minutes was created to adjust the format of the clock times in the data. The *k-means* algorithm finds a clustering structure, that minimizes the sum squared error which measures the distance of each datapoint to its representative value. The center of each cluster was then calculated as the mean of all observations in the cluster, which was extracted in hours and minutes. Calculated times were rounded to quarter, half, three-quarter, or whole hours and visually displayed in scatterplots for discussion with participants of the EG. If the calculated times were incompatible with, for example, participants' work schedules, they had the opportunity to adjust the times of meals accordingly. Then, an agreement was reached to eat only at these times for the next six weeks. For each meal, a time window of plus/minus 30 minutes around the specified time was granted. The participants were instructed not to

advance missed meals or to make up for them at times that did not correspond to the established times, but to wait for the next established mealtime if possible. A scatterplot was also created for participants of the CG, but they were not provided with meal timings; instead, an 18-hour time window for meals was established with them.

#### 4.7. Statistical Analyses

Statistical analyses were performed with SPSS 24, Python, GraphPad Prism 9.2.0, and R. Details about statistical tests used for specific experiments are indicated in the main text and the corresponding figure legends.

##### 4.7.1. Mealtime Variability Score (MTVS)

A Python script was written to generate the MTVS, which is calculated from the deviation of each caloric event from the specified mealtime closest to the event. Similar to a previous study, each meal was given a score value based on the time deviation of the specified meal in minutes: 1 = +/- 0-15 min, 2 = +/- 16-30 min, 3 = +/- 31-45 min, 4 = +/- 46-60 min, 5 = +/- 61-75 min, 6 = +/- 76-90 min, 7 = +/- 91-105 min, 8 = +/- 106-120 min, 9 = +/- 2-3 h, 10 = +/- 3-4 h, 11 = over +/- 4 h [20]. Since the participants were given a 60-minute time slot for each meal, a score of up to 2 is considered very regular. Based on individual score values of each meal, an average score value can be calculated for each individual day, for each individual week or for the entire period, i.e., a daily, a weekly, or a total score. Similarly, daily, weekly, and total scores can be calculated for each type of meal, i.e., breakfast, lunch, dinner.

##### 4.7.2. Sample Size and randomization

For the sample size calculation, we assumed an average of 2.5 kg of body weight loss, based on TRE studies [18, 19, 21-23], as we are not aware of any other study in which meal times were personalized and scheduled. The reported standard deviation for body weight loss in such studies is 3.2 [19]. Randomization was to be 2:1 (EG:CG) because no significant change in body weight was expected from the control treatment. The randomized assignment was carried out using a continuous list prepared by the study supervisor with the Excel® randomization function. Participant enrollment and assignment was carried out by study staff. On this basis a large effect size  $d = 0.8$  was assumed for the calculation of the power analysis in G\*Power and transformed into the effect size  $f = 0.4$ . The sample size calculation was performed a priori for two groups (EG and CG) and the main three measuring time points (T<sub>0</sub>, T<sub>1</sub>, T<sub>2</sub>) resulting in a sample size of N = 100 participants.

##### 4.7.3. Within- and Between Group Comparisons across T<sub>0</sub>-T<sub>1</sub> and T<sub>1</sub>-T<sub>2</sub>

Two-way repeated-measures ANOVA was used to compare group and time effects in the CG and EG and in the exploration (T<sub>0</sub>-T<sub>1</sub>) and intervention (T<sub>1</sub>-T<sub>2</sub>) phases, as well as effects of

the interaction of group and time. Additionally, Bonferroni's multiple comparison tests were used to compare effects of time within groups (To-T1 vs. T1-T2 within CG or EG) and effects between groups at either the exploration or intervention phase (CG vs. EG at To-T1 or T1-T2). This form of analysis was applied to data in Figures 1C, 2A & C, 3B-D, 4A & B, and S2J. If missing data points prevented a repeated-measure analysis, a mixed-effects model with Bonferroni's multiple comparison test was applied instead. This applies to the data in Figures 1F, S2C & G. When comparisons were made only between exploration and intervention phases within a group, a paired t-test was applied, which is the case for data shown in Figure 3I. When comparisons were made with groups with very different n-numbers, Welch's test was used instead of the t-test. This applied to data shown in Figure S2A.

#### 4.7.4. *Body Weight Development over Time*

To analyze the change in body weight within the CG and EG groups over the To-T2 period, one-way repeated measures ANOVA with Bonferroni's multiple comparison test was applied. The division of CG and EG into continuing and discontinuing did not allow inclusion of T3 data in the repeated measures analysis. Therefore, the comparison between T2 and T3 was completed with a paired t-test. This type of analysis was applied in data of Figures 1E and S2A.

#### 4.7.5. *Relationships between parameters*

Simple linear regression was used to determine whether two different parameters were related. This analysis was performed with data from Figures 1G, 2B & D, 3B-E, G & J, and S2H, I, L, & M. Relationships of more than two parameters were analyzed with multiple regression, which applies to data from Figures 1H and 3K.

#### 4.7.6. *Circadian Phase Distribution*

The mSP was evaluated according to the MCTQ [24]. The mEP was calculated in the same way, but instead of using the time of falling asleep and the time of waking up as in the calculation of the mSP, the first and the last meal of the day were used for the calculation. The distribution of each calculated phase was analyzed using Rayleigh's uniformity test. This analysis concerns the data shown in Figure 3F.



## 631 References

- 632 1. Mure, L.S., et al., *Diurnal transcriptome atlas of a primate across major neural and peripheral*  
633 *tissues*. Science, 2018.
- 634 2. Ruben, M.D., et al., *A database of tissue-specific rhythmically expressed human genes has*  
635 *potential applications in circadian medicine*. Sci Transl Med, 2018. **10**(458).
- 636 3. Di Lorenzo, L., et al., *Effect of shift work on body mass index: results of a study performed in*  
637 *319 glucose-tolerant men working in a Southern Italian industry*. Int J Obes Relat Metab  
638 Disord, 2003. **27**(11): p. 1353-8.
- 639 4. Antunes, L.C., et al., *Obesity and shift work: chronobiological aspects*. Nutr Res Rev, 2010.  
640 **23**(1): p. 155-68.
- 641 5. Vetter, C., et al., *Association Between Rotating Night Shift Work and Risk of Coronary Heart*  
642 *Disease Among Women*. JAMA, 2016. **315**(16): p. 1726-34.
- 643 6. Sun, M., et al., *Meta-analysis on shift work and risks of specific obesity types*. Obes Rev, 2018.  
644 **19**(1): p. 28-40.
- 645 7. Morris, C.J., et al., *Effects of the Internal Circadian System and Circadian Misalignment on*  
646 *Glucose Tolerance in Chronic Shift Workers*. J Clin Endocrinol Metab, 2016. **101**(3): p. 1066-  
647 74.
- 648 8. Turek, F.W., et al., *Obesity and metabolic syndrome in circadian Clock mutant mice*. Science,  
649 2005. **308**(5724): p. 1043-5.
- 650 9. Barclay, J.L., et al., *High-fat diet-induced hyperinsulinemia and tissue-specific insulin*  
651 *resistance in Cry-deficient mice*. Am J Physiol Endocrinol Metab, 2013. **304**(10): p. E1053-63.
- 652 10. Shi, S.Q., et al., *Circadian disruption leads to insulin resistance and obesity*. Curr Biol, 2013.  
653 **23**(5): p. 372-81.
- 654 11. Zarrinpar, A., A. Chaix, and S. Panda, *Daily Eating Patterns and Their Impact on Health and*  
655 *Disease*. Trends Endocrinol Metab, 2016. **27**(2): p. 69-83.
- 656 12. Lee, A., et al., *Night Shift Work and Risk of Depression: Meta-analysis of Observational*  
657 *Studies*. J Korean Med Sci, 2017. **32**(7): p. 1091-1096.
- 658 13. Torquati, L., et al., *Shift Work and Poor Mental Health: A Meta-Analysis of Longitudinal*  
659 *Studies*. Am J Public Health, 2019. **109**(11): p. e13-e20.
- 660 14. Landgraf, D., et al., *Genetic Disruption of Circadian Rhythms in the Suprachiasmatic Nucleus*  
661 *Causes Helplessness, Behavioral Despair, and Anxiety-like Behavior in Mice*. Biological  
662 Psychiatry, 2016. **80**: p. 827-835.
- 663 15. Kolbe, I., et al., *Circadian clock network desynchrony promotes weight gain and alters glucose*  
664 *homeostasis in mice*. Mol Metab, 2019. **30**: p. 140-151.
- 665 16. Chaix, A., et al., *Time-restricted feeding is a preventative and therapeutic intervention against*  
666 *diverse nutritional challenges*. Cell Metab, 2014. **20**(6): p. 991-1005.
- 667 17. Hatori, M., et al., *Time-restricted feeding without reducing caloric intake prevents metabolic*  
668 *diseases in mice fed a high-fat diet*. Cell Metab, 2012. **15**(6): p. 848-60.
- 669 18. Gill, S. and S. Panda, *A Smartphone App Reveals Erratic Diurnal Eating Patterns in Humans*  
670 *that Can Be Modulated for Health Benefits*. Cell Metab, 2015. **22**(5): p. 789-98.
- 671 19. Wilkinson, M.J., et al., *Ten-Hour Time-Restricted Eating Reduces Weight, Blood Pressure, and*  
672 *Atherogenic Lipids in Patients with Metabolic Syndrome*. Cell Metab, 2020. **31**(1): p. 92-104  
673 e5.
- 674 20. Soehner, A.M., K.S. Kennedy, and T.H. Monk, *Circadian preference and sleep-wake regularity:*  
675 *associations with self-report sleep parameters in daytime-working adults*. Chronobiol Int,  
676 2011. **28**(9): p. 802-9.
- 677 21. Domaszewski, P., et al., *Effect of a Six-Week Intermittent Fasting Intervention Program on the*  
678 *Composition of the Human Body in Women over 60 Years of Age*. Int J Environ Res Public  
679 Health, 2020. **17**(11).
- 680 22. Gabel, K., et al., *Effects of 8-hour time restricted feeding on body weight and metabolic*  
681 *disease risk factors in obese adults: A pilot study*. Nutr Healthy Aging, 2018. **4**(4): p. 345-353.

23. Xie, Z., et al., *Randomized controlled trial for time-restricted eating in healthy volunteers without obesity*. Nat Commun, 2022. **13**(1): p. 1003.
24. Roenneberg, T., A. Wirz-Justice, and M. Mellow, *Life between clocks: daily temporal patterns of human chronotypes*. J Biol Rhythms, 2003. **18**(1): p. 80-90.
25. Chaix, A., et al., *Time-Restricted Feeding Prevents Obesity and Metabolic Syndrome in Mice Lacking a Circadian Clock*. Cell Metab, 2019. **29**(2): p. 303-319 e4.
26. Fleischer, J.G., et al., *Associations between the timing of eating and weight-loss in calorically restricted healthy adults: Findings from the CALERIE study*. Exp Gerontol, 2022. **165**: p. 111837.
27. Lowe, D.A., et al., *Effects of Time-Restricted Eating on Weight Loss and Other Metabolic Parameters in Women and Men With Overweight and Obesity: The TREAT Randomized Clinical Trial*. JAMA Intern Med, 2020.
28. Martinez-Lopez, N., et al., *System-wide Benefits of Intermeal Fasting by Autophagy*. Cell Metab, 2017. **26**(6): p. 856-871 e5.
29. Jakubowicz, D., et al., *Reduction in Glycated Hemoglobin and Daily Insulin Dose Alongside Circadian Clock Upregulation in Patients With Type 2 Diabetes Consuming a Three-Meal Diet: A Randomized Clinical Trial*. Diabetes Care, 2019. **42**(12): p. 2171-2180.
30. Thaïss, C.A., et al., *Transkingdom control of microbiota diurnal oscillations promotes metabolic homeostasis*. Cell, 2014. **159**(3): p. 514-29.
31. Mashraqi, S. and D. Gozal, "Circadian misalignment and the gut microbiome. A bidirectional relationship triggering inflammation and metabolic disorders"- a literature review. Sleep Med, 2020. **72**: p. 93-108.
32. Voigt, R.M., et al., *Circadian disorganization alters intestinal microbiota*. PLoS One, 2014. **9**(5): p. e97500.
33. Kuang, Z., et al., *The intestinal microbiota programs diurnal rhythms in host metabolism through histone deacetylase 3*. Science, 2019. **365**(6460): p. 1428-1434.
34. Wang, Y., et al., *The intestinal microbiota regulates body composition through NFIL3 and the circadian clock*. Science, 2017. **357**(6354): p. 912-916.
35. Scheving, L.A., *Biological clocks and the digestive system*. Gastroenterology, 2000. **119**(2): p. 536-49.
36. Cummings, D.E., et al., *A preprandial rise in plasma ghrelin levels suggests a role in meal initiation in humans*. Diabetes, 2001. **50**(8): p. 1714-9.
37. Natalucci, G., et al., *Spontaneous 24-h ghrelin secretion pattern in fasting subjects: maintenance of a meal-related pattern*. Eur J Endocrinol, 2005. **152**(6): p. 845-50.
38. Landgraf, D., A.M. Neumann, and H. Oster, *Circadian clock-gastrointestinal peptide interaction in peripheral tissues and the brain*. Best Pract Res Clin Endocrinol Metab, 2017. **31**(6): p. 561-571.
39. Vollmers, C., et al., *Time of feeding and the intrinsic circadian clock drive rhythms in hepatic gene expression*. Proc Natl Acad Sci U S A, 2009. **106**(50): p. 21453-8.
40. Unick, J.L., et al., *The long-term effectiveness of a lifestyle intervention in severely obese individuals*. Am J Med, 2013. **126**(3): p. 236-42, 242 e1-2.
41. Barte, J.C., et al., *Differences in weight loss across different BMI classes: a meta-analysis of the effects of interventions with diet and exercise*. Int J Behav Med, 2014. **21**(5): p. 784-93.

## **Data availability**

All data produced in the present study are available upon reasonable request to the authors.

## **Code availability**

The codes used to calculate MTVS, individual optimal number of meals, and personalized optimal eating times will be available at <https://github.com/dolandgraf/Time-To-Eat.git> as of the date of publication of this paper.

## **Acknowledgments**

We would like to thank all participants for their participation in this study. We also gratefully acknowledge Thomas Schneider-Axmann (Ludwig Maximilians Universität Munich, Germany) and Elisabeth Paul (Linköping University, Sweden) for their valuable contribution to the statistical analysis.

## **Funding**

This work was supported by an Emmy Noether fellowship: LA4126/1-1 of the Deutsche Forschungsgemeinschaft to DL. The funder had no role in study design, data collection and analysis, decision to publish, or preparation of the manuscript.

## **Author Contributions**

DL, AHL, IW: Conceptualization  
 IW, JT, JMO, TJGB, DL: Data curation  
 DL: Formal Analysis  
 DL: Funding acquisition  
 IW, JT, JMO, TJGB: Investigation  
 IW, DL, AHL: Methodology  
 DL: Project administration  
 DL, IW: Resources  
 IW, JT: Software  
 DL: Supervision  
 DL, IW, AHL: Validation  
 DL: Visualization

759 DL: Writing – original draft  
760 DL, AHL, IW: Writing review & editing  
761

## 762 **Ethics declaration**

763 The conduct of the study was evaluated and approved by the Ethics Committee of Ludwig  
764 Maximilian University under file number 19-975.

765

## 766 **Competing interests**

767 The authors declare no competing interest.

768

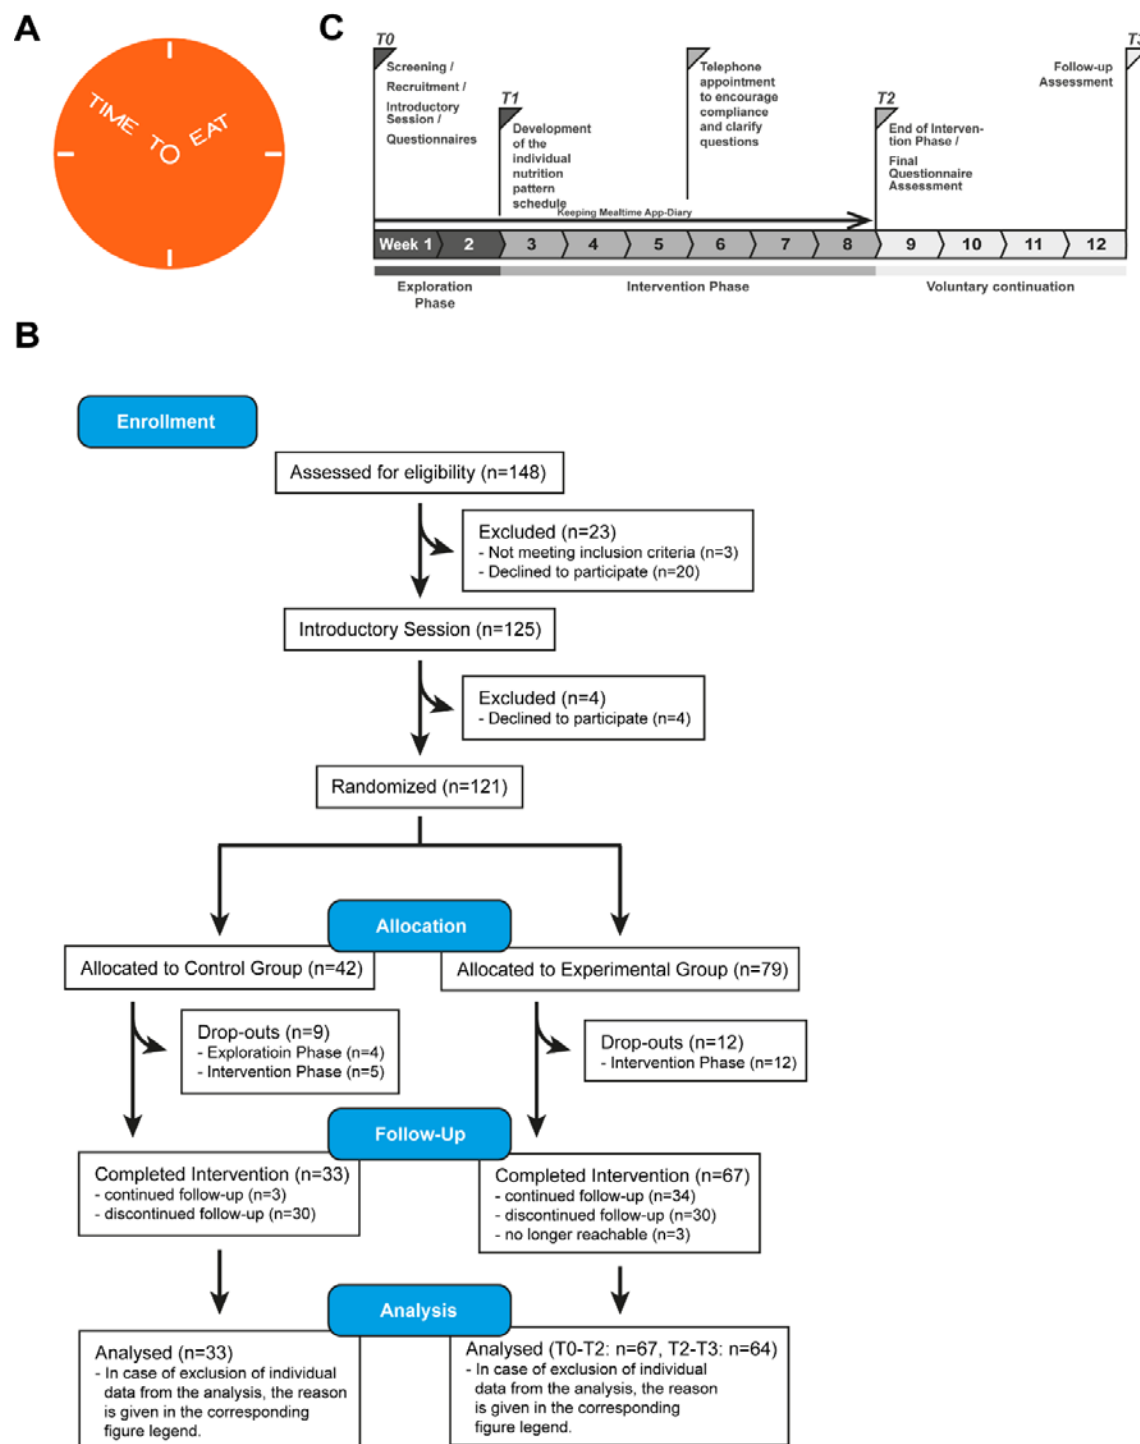

*Fig. S1: (A) Logo of the “Time To Eat” study. The logo represents a clock in which the letters act as hands. (B) Consort diagram through the phases of the trial. A total of 148 initial participants were recruited. Of these, 48 were excluded or withdrew from the study in the course of the trial. Thus, the final study sample consisted of 100 participants of whom 67 were allocated to the EG and 33 to the CG. Until the follow-up appointment, 34 EG participants voluntarily continued the intervention. 30 EG participants discontinued the intervention but were available for further data collection, while three EG participants were no longer available and thus no analyzable data were available from them at T3. Of the 33 CG participants, only three voluntarily continued the sham intervention until T3. (C)*

*Timeline of the study. INTRODUCTORY SESSION: Test participants are screened, recruited by a member of the study staff, and sign the consent form. This is followed by an introductory session where they are informed about the contents of the study and familiarized with the FDDDB smartphone application. In addition, questionnaires are filled out and weight and abdominal girth are measured. EXPLORATION PHASE: During the following two weeks, the participants are asked to record each caloric event with the FDDDB app. Afterwards, a mealtime schedule is developed for each participant. INTERVENTION PHASE: During the following six weeks, the participants are instructed to take their meals only at times according to the mealtime schedule and to report their weight weekly. In the middle of the intervention phase, a telephone appointment is made to maintain compliance. FINAL QUESTIONNAIRE ASSESSMENT: At the end of the intervention phase, the participants are asked to fill out the same questionnaires as at the introduction session. FOLLOW-UP ASSESSMENT: After another four weeks, the test participants are contacted again to explore whether they have continued the intervention voluntarily and to ask again for their body weight.*

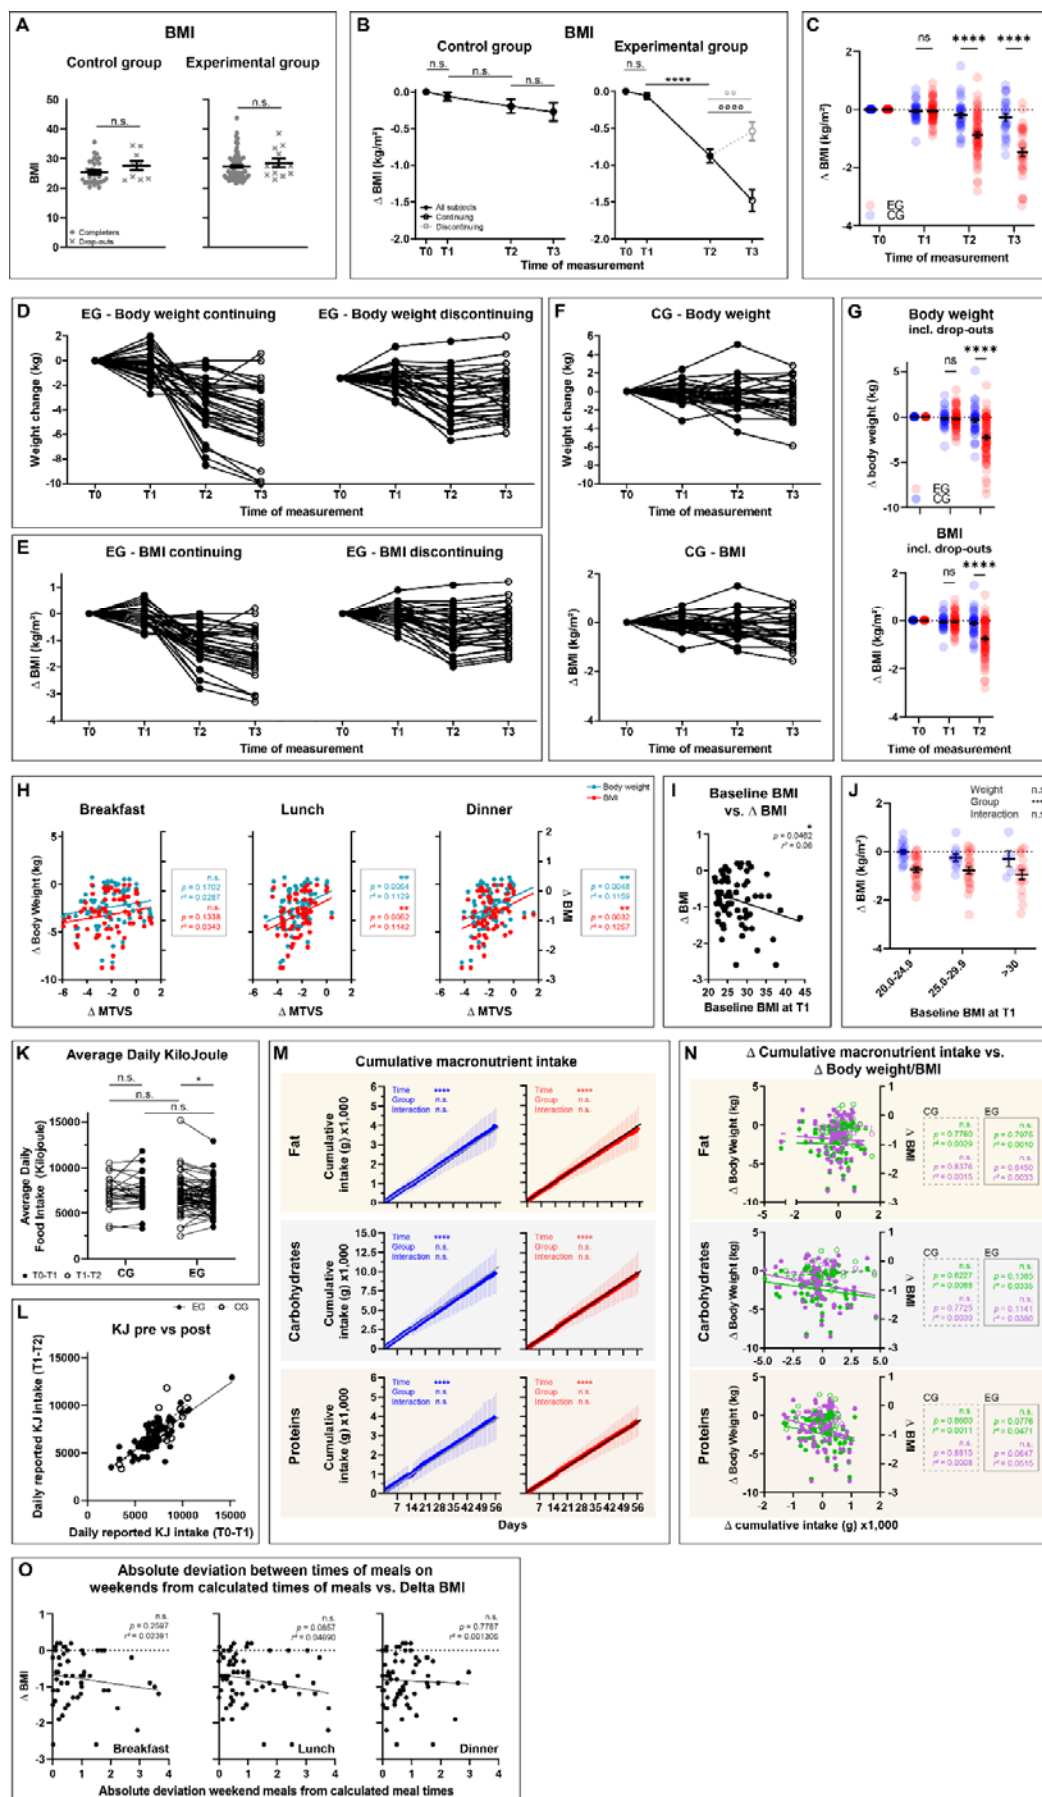

Fig. S2: (A) BMI differences between study completers and drop-outs. Differences were calculated with a Welch's test (detailed statistics in Tab. S2). (B) Within group differences of BMI during the study. BMI was collected at different time points, at the beginning of the study (To), after the exploration phase (T1), after the intervention phase (T2), and after the follow-up phase (T3). During the follow-up phase, 34 EG participants voluntarily continued the intervention (continuing; black line and open circle) while 33 participants dropped out (discontinuing; gray, dashed line and open circle). Only three control subjects continued their intervention in the follow-up phase, which is why a division into continuing and discontinuing was omitted in this group. Data are normalized so that all baseline data at To equals 0 to represent change. Differences of all CG and EG participants between To, T1, and T2 were calculated with a 1-way ANOVA, as were differences between T2 and T3 of CG participants (Bonferroni post-hoc test, \*\*\*\*  $p \leq 0.0001$ ). Differences between T2 and T3 of continuing and discontinuing EG participants were calculated with a paired t-test °°  $p \leq 0.01$ , °°°°  $p \leq 0.0001$  (detailed statistics in Tab. S4). (C) Between group differences of BMI from To-T3. Mixed-effect model with Bonferroni post-hoc test comparing CG and EG at different phases during the study, \*\*\*\*  $p \leq 0.0001$  (detailed statistics in Tab. S5). Individual body weight (D) and BMI (E) changes of all 34 continuing and all 33 discontinuing participants of the EG group and of CG participants (F) during the study. Data is normalized so that all baseline data at To equals 0 to represent change. (G) Between group differences of body weight and BMI from To-T3 including the last available values of study drop-outs which were carried forward. Mixed-effect model with Bonferroni post-hoc test comparing CG and EG at different phases during the study, \*\*\*\*  $p \leq 0.0001$  (detailed statistics in Tab. S5). (H) Significant correlation between body weight/BMI and MTVS of lunch and dinner. The more participants improved their regularity of lunch and dinner (decreasing MTVS), the more weight/BMI they lost. Linear regression, CG:  $n=33$ ; EG:  $n=67$ , \*\*  $p \leq 0.01$  (detailed statistics in Tab. S6). (I) Correlation between baseline BMI at T1 and change in BMI in EG participants. Linear regression,  $n=67$  (detailed statistics in Tab. S6). (J) Between group differences after stratification according to different baseline BMIs. 2-way repeated-measure ANOVA with Bonferroni post-hoc test, \*\*\*  $p \leq 0.001$  (detailed statistics in Tab. S8). (K) Raw data of change in caloric intake during intervention. 2-way repeated-measure ANOVA with Bonferroni post-hoc test, CG:  $n=30$ ; EG:  $n=67$ , \*  $p \leq 0.05$ , (detailed statistics in Tab. S3). (L) Correlation between reported ingested energy during the exploration phase vs. the intervention phase. Linear regression, CG:  $n=30$ ; EG:  $n=67$  (some participants were excluded from this analysis because of several erroneous diary entries about unrealistic amounts of food), (detailed statistics in Tab. S6). (M) Determined and estimated cumulative intake of fat, carbohydrates, and proteins during the study. Mixed-effects model with Bonferroni post hoc test comparing determined and estimated cumulative energy intake. The estimated macronutrient intake is formed as an assumed continuation of the average daily intake during the exploration phase. The Bonferroni post hoc test showed no significant differences on any study day. (N) No significant correlation between body weight/BMI and changes of cumulative macronutrient intake. Linear regression, CG:  $n=30$ ; EG:  $n=67$ , (detailed statistics in Tab. S6). (K, L, M, N) Some participants were excluded from this analysis because of several erroneous diary entries about unrealistic amounts of food. (O) The absolute deviation between the times of weekend meals and the times of food intake calculated for the EG intervention did not affect the subjects' BMI change. Linear regression,  $n=67$  (detailed statistics in Tab. S6).



**Table S1:** Baseline characteristics of final 100 participants.

| Characteristic                           | CG (n = 33; male: 1, female: 23) |                             |               | EG (n = 67; male: 26, female: 41) |                             |               | Difference CG - EG |         |
|------------------------------------------|----------------------------------|-----------------------------|---------------|-----------------------------------|-----------------------------|---------------|--------------------|---------|
|                                          | Mean                             | Range                       | SD            | Mean                              | Range                       | SD            | p-value            | Summary |
| BMI (kg/m <sup>2</sup> ) incl. drop-outs | 25.9                             | 20.3 / 35.7                 | 4.138         | 27.5                              | 21.7 / 43.8                 | 4.627         | .0597              | n.s.    |
| Age (years)                              | 33                               | 20-60                       | 12.08         | 38                                | 19 - 64                     | 14.49         | .0795              | n.s.    |
| BMI (kg/m <sup>2</sup> ) (T0/T1)         | 25.5 / 25.4                      | 20.4 – 35.8 / 20.3 – 35.7   | 3.83 / 3.88   | 27.4 / 27.3                       | 22.0 – 43.6 / 21.7 – 43.8   | 4.62 / 4.59   | .0420 / .0420      | * / *   |
| BMI (T2)                                 | 25.3                             | 20.4 – 34.6                 | 3.77          | 26.5                              | 21.2 – 42.5                 | 4.47          | .1680              | n.s.    |
| Δ BMI (T0-T2)                            | -.20                             | -1.17 – 1.52                | .55           | -.87                              | -2.8 – 1.0                  | .72           | .0420              | *       |
| Body weight (kg) (T0/T1)                 | 75.04 / 74.87                    | 54.2 – 134.6 / 54.0 – 134.2 | 16.94 / 17.07 | 82.73 / 82.52                     | 58.5 – 129.0 / 58.1 – 129.5 | 16.72 / 16.59 | .0338 / .0342      | * / *   |
| Body weight (T2)                         | 74.48                            | 53.5 – 130.2                | 16.84         | 80.11                             | 56.3 – 125.8                | 16.30         | .1116              | n.s.    |
| Δ Body weight (T0-T2)                    | -.56                             | -4.4 – 5.1                  | 1.72          | -2.62                             | -8.5 – 3.5                  | 2.23          | .0338              | *       |
| MTVS exploration (total)                 | 3.35                             | 1.32 – 4.79                 | .8081         | 3.88                              | 1.11 – 5.76                 | .9086         | .0058              | **      |
| MTVS intervention (total)                | 3.94                             | 2.45 – 5.13                 | .7203         | 1.72                              | 1.02 – 3.84                 | .6156         | <.0001             | ****    |
| ΔMTVS (total)                            | .583                             | -.940 – 3.47                | .9051         | -2.16                             | -4.69 - .420                | .9571         | <.0001             | ****    |
| KJ intake exploration                    | 7,211                            | 3,350 – 1,537               | 1,596         | 7,071                             | 2,505 – 15,185              | 1,854         | .7197              | n.s.    |
| KJ intake intervention                   | 7,248                            | 3,324 – 11,829              | 1,766         | 6,723                             | 3,496 – 12,932              | 1,661         | .1618              | n.s.    |
| % Fat exploration                        | 20.73                            | 11.59 – 26.12               | 3.639         | 21.85                             | 10.86 – 32.30               | 3.811         | .1773              | n.s.    |
| % Fat intervention                       | 22.06                            | 12.54 – 28.98               | 3.282         | 21.40                             | 11.70 – 28.91               | 3.158         | .3477              | n.s.    |
| % Carbohydrate exploration               | 57.51                            | 47.63 – 71.40               | 6.536         | 56.23                             | 42.69 – 71.11               | 6.247         | .3607              | n.s.    |
| % Carbohydrate intervention              | 56.54                            | 45.29 – 70.90               | 5.712         | 55.90                             | 35.20 – 68.59               | 5.282         | .5969              | n.s.    |
| % Protein exploration                    | 21.77                            | 12.56 – 31.56               | 4.456         | 21.92                             | 13.29 – 35.51               | 4.520         | .8747              | n.s.    |
| % Protein intervention                   | 21.41                            | 15.07 – 30.13               | 3.688         | 22.70                             | 16.80 - 39.78               | 40.70         | .1398              | n.s.    |

**Table S2:** Statistical data on the difference between completers and study drop-outs. The data in the table refers to the data shown in Fig. S2A.

| Fig. | Group | Variable value (mean ± SD) |         |               |         | Statistical test | d.f.  | t-value | Significance |         |
|------|-------|----------------------------|---------|---------------|---------|------------------|-------|---------|--------------|---------|
|      |       | Completers                 | n-value | Drop-outs     | n-value |                  |       |         | p-value      | Summary |
| S2A  | CG    | 25.40 ± 3.882              | 33      | 27.65 ± 4.793 | 9       | Welch's test     | 11.03 | 1.298   | .2207        | n.s.    |
|      | EG    | 27.32 ± 4.586              | 67      | 28.53 ± 4.932 | 12      |                  | 14.61 | .7873   | .4437        | n.s.    |

SD = Standard deviation  
d.f. = degree of freedom  
n.s. = not significant

**Table S3:** Statistical data from all Two-way-RM ANOVAs analyzing time, group, as well as interaction effects between time x group. In data for Figure 1, missing *p*-values in the and EG are due to the different number of meals for each participant. In the data for Figure 2, some participants were excluded from this analysis because of several probably erroneous diary entries about unrealistic amounts of food. In data for Figure 3, varying *n*-numbers result from incomplete entries in the diaries. In data for Figure 4, missing data are due to incomplete questionnaires.

| Fig. | Meal                            | MTVS (mean; 95% CI)      |                          |         |                          |                          |         | Statistical test | ANOVA results | Source of Variation |        |              | Bonferroni post-hoc            |      |           |      |                           |      |              |      |
|------|---------------------------------|--------------------------|--------------------------|---------|--------------------------|--------------------------|---------|------------------|---------------|---------------------|--------|--------------|--------------------------------|------|-----------|------|---------------------------|------|--------------|------|
|      |                                 | CG                       |                          |         | EG                       |                          |         |                  |               |                     |        |              | Within Group (T0-T1 vs. T1-T2) |      |           |      | Between Group (CG vs. EG) |      |              |      |
|      |                                 | Exploration phase        | Intervention phase       | n-value | Exploration phase        | Intervention phase       | n-value |                  |               | Time                | Group  | Time x Group | CG p-val.                      | Sum. | EG p-val. | Sum. | T0-T1 p-val.              | Sum. | T1-T2 p-val. | Sum. |
| 1C   | Breakfast                       | 3.257;<br>(2.742, 3.773) | 4.352;<br>(3.755, 4.948) | 33      | 3.893;<br>(3.508, 4.278) | 1.722;<br>(1.543, 1.902) | 66      | Two-way RM ANOVA | d.f.          | 1, 97               | 1, 97  | 1, 97        | .0012                          | **   | <.0001    | **** | .0564                     | n.s. | <.0001       | **** |
|      |                                 |                          |                          |         |                          |                          |         |                  | F-value       | 21.20               | 8.111  | 74.63        |                                |      |           |      |                           |      |              |      |
|      |                                 |                          |                          |         |                          |                          |         |                  | p-value       | <.0001              | .0054  | <.0001       |                                |      |           |      |                           |      |              |      |
|      |                                 |                          |                          |         |                          |                          |         |                  | Summary       | ****                | **     | ****         |                                |      |           |      |                           |      |              |      |
|      | Lunch                           | 3.331;<br>(2.93, 3.731)  | 3.743;<br>(3.352, 4.135) | 33      | 4.021;<br>(3.75, 4.292)  | 1.668;<br>(1.484, 1.852) | 67      |                  | d.f.          | 1, 98               | 1, 98  | 1, 98        | .0543                          | n.s. | <.0001    | **** | .0030                     | **   | <.0001       | **** |
|      |                                 |                          |                          |         |                          |                          |         |                  | F-value       | 14.45               | 74.51  | 151.4        |                                |      |           |      |                           |      |              |      |
|      |                                 |                          |                          |         |                          |                          |         |                  | p-value       | .0003               | <.0001 | <.0001       |                                |      |           |      |                           |      |              |      |
|      |                                 |                          |                          |         |                          |                          |         |                  | Summary       | ***                 | ****   | ****         |                                |      |           |      |                           |      |              |      |
|      | Dinner                          | 3.358;<br>(3.033, 3.633) | 3.807;<br>(3.527, 4.087) | 33      | 3.740;<br>(3.477, 4.002) | 1.778;<br>(1.619, 1.937) | 64      |                  | d.f.          | 1, 95               | 1, 95  | 1, 95        | .0384                          | *    | <.0001    | **** | .0814                     | n.s. | <.0001       | **** |
|      |                                 |                          |                          |         |                          |                          |         |                  | F-value       | 32.57               | 42.20  | 107.8        |                                |      |           |      |                           |      |              |      |
|      |                                 |                          |                          |         |                          |                          |         |                  | p-value       | <.0001              | <.0001 | <.0001       |                                |      |           |      |                           |      |              |      |
|      |                                 |                          |                          |         |                          |                          |         |                  | Summary       | ****                | ****   | ****         |                                |      |           |      |                           |      |              |      |
| 1D   | Total                           | 3.353;<br>(3.066, 3.640) | 3.936;<br>(3.681, 4.192) | 33      | 3.879;<br>(3.658, 4.101) | 1.723;<br>(1.573, 1.873) | 67      | Two-way RM ANOVA | d.f.          | 1, 98               | 1, 98  | 1, 98        | .0011                          | **   | <.0001    | **** | .0032                     | **   | <.0001       | **** |
|      |                                 |                          |                          |         |                          |                          |         |                  | F-value       | 41.87               | 61.87  | 187.7        |                                |      |           |      |                           |      |              |      |
|      |                                 |                          |                          |         |                          |                          |         |                  | p-value       | <.0001              | <.0001 | <.0001       |                                |      |           |      |                           |      |              |      |
|      |                                 |                          |                          |         |                          |                          |         |                  | Summary       | ****                | ****   | ****         |                                |      |           |      |                           |      |              |      |
| 2A   | Daily KJ intake (x-fold change) | 1.0;<br>(. . .0)         | 1.011;<br>(.9599, 1.062) | 30      | 1.0;<br>(. . .0)         | .9718;<br>(.927, 1.017)  | 67      | Two-way RM ANOVA | d.f.          | 1, 95               | 1, 95  | 1, 95        | >.9999                         | n.s. | .3604     | n.s. | >.9999                    | n.s. | .2877        | n.s. |
|      |                                 |                          |                          |         |                          |                          |         |                  | F-value       | .2152               | 1.077  | 1.077        |                                |      |           |      |                           |      |              |      |
|      |                                 |                          |                          |         |                          |                          |         |                  | p-value       | .6438               | .3020  | .3020        |                                |      |           |      |                           |      |              |      |
|      |                                 |                          |                          |         |                          |                          |         |                  | Summary       | n.s.                | n.s.   | n.s.         |                                |      |           |      |                           |      |              |      |
| S2K  | Average daily KJ intake         | 7212;<br>(6615, 7808)    | 7248;<br>(6588, 7907)    | 30      | 7071;<br>(6619, 7523)    | 6723;<br>(6318, 7128)    | 67      | Two-way RM ANOVA | d.f.          | 1, 95               | 1, 95  | 1, 95        | >.9999                         | n.s. | .0271     | *    | >.9999                    | n.s. | .3416        | n.s. |
|      |                                 |                          |                          |         |                          |                          |         |                  | F-value       | 1.571               | .8500  | .1256        |                                |      |           |      |                           |      |              |      |
|      |                                 |                          |                          |         |                          |                          |         |                  | p-value       | .2131               | .3589  | .1256        |                                |      |           |      |                           |      |              |      |
|      |                                 |                          |                          |         |                          |                          |         |                  | Summary       | n.s.                | n.s.   | n.s.         |                                |      |           |      |                           |      |              |      |
| 2C   | % Fat                           | 20.73;<br>(19.37, 22.09) | 22.06;<br>(20.83, 23.28) | 30      | 21.85;<br>(20.92, 22.78) | 21.40;<br>(20.63, 22.17) | 67      | Two-way RM ANOVA | d.f.          | 1, 95               | 1, 95  | 1, 95        | .0394                          | *    | .4577     | n.s. | .2895                     | n.s. | .7767        | n.s. |
|      |                                 |                          |                          |         |                          |                          |         |                  | F-value       | 1.686               | .1115  | 6.998        |                                |      |           |      |                           |      |              |      |
|      |                                 |                          |                          |         |                          |                          |         |                  | p-value       | .1973               | .7391  | .0095        |                                |      |           |      |                           |      |              |      |
|      |                                 |                          |                          |         |                          |                          |         |                  | Summary       | n.s.                | n.s.   | **           |                                |      |           |      |                           |      |              |      |
|      | % Carbo-hydrates                | 57.51;<br>(55.07, 59.95) | 56.54;<br>(54.4, 58.67)  | 30      | 56.23;<br>(54.7, 57.75)  | 55.90;<br>(54.62, 57.19) | 67      |                  | d.f.          | 1, 95               | 1, 95  | 1, 95        | .4796                          | n.s. | >.9999    | n.s. | .6494                     | n.s. | >.9999       | n.s. |
|      |                                 |                          |                          |         |                          |                          |         |                  | F-value       | 1.719               | .6365  | .4293        |                                |      |           |      |                           |      |              |      |
|      |                                 |                          |                          |         |                          |                          |         |                  | p-value       | .1930               | .4270  | .5139        |                                |      |           |      |                           |      |              |      |
|      |                                 |                          |                          |         |                          |                          |         |                  | Summary       | n.s.                | n.s.   | n.s.         |                                |      |           |      |                           |      |              |      |
|      | % Prote-ins                     | 21.77;<br>(20.1, 23.43)  | 21.41;<br>(20.03, 22.78) | 30      | 21.82;<br>(20.82, 23.02) | 22.70;<br>(21.71, 23.69) | 67      |                  | d.f.          | 1, 95               | 1, 95  | 1, 95        | .9850                          | n.s. | .0564     | n.s. | >.9999                    | n.s. | .3322        | n.s. |
|      |                                 |                          |                          |         |                          |                          |         |                  | F-value       | .4446               | .6848  | 3.284        |                                |      |           |      |                           |      |              |      |
|      |                                 |                          |                          |         |                          |                          |         |                  | p-value       | .5065               | .4100  | .0731        |                                |      |           |      |                           |      |              |      |
|      |                                 |                          |                          |         |                          |                          |         |                  | Summary       | n.s.                | n.s.   | n.s.         |                                |      |           |      |                           |      |              |      |
| 3B   | 95%ile calorie intake interval  | 13.29;<br>(12.24, 14.34) | 13.73;<br>(12.9, 14.56)  | 32      | 13.00;<br>(12.45, 13.56) | 10.99;<br>(10.47, 11.52) | 67      | Two-way RM ANOVA | d.f.          | 1, 97               | 1, 97  | 1, 97        | 0.4686                         | n.s. | <.0001    | **** | >.9999                    | n.s. | <.0001       | **** |
|      |                                 |                          |                          |         |                          |                          |         |                  | F-value       | 12.31               | 11.15  | 30.00        |                                |      |           |      |                           |      |              |      |
|      |                                 |                          |                          |         |                          |                          |         |                  | p-value       | .0007               | .0012  | <.0001       |                                |      |           |      |                           |      |              |      |
|      |                                 |                          |                          |         |                          |                          |         |                  | Summary       | ***                 | **     | ****         |                                |      |           |      |                           |      |              |      |
| 3C   | Breakfast time                  | 8.39 ± 1.685             | 8.06 ± 1.434             | 33      | 8.24 ± 1.516             | 9.37 ± 1.633             | 67      | Two-way RM ANOVA | d.f.          | 1, 98               | 1, 98  | 1, 98        | 0.2939                         | n.s. | <.0001    | **** | >.9999                    | n.s. | .0002        | ***  |
|      |                                 |                          |                          |         |                          |                          |         |                  | F-value       | 8.122               | 3.637  | 27.49        |                                |      |           |      |                           |      |              |      |
|      |                                 |                          |                          |         |                          |                          |         |                  | p-value       | .0053               | .0594  | <.0001       |                                |      |           |      |                           |      |              |      |
|      |                                 |                          |                          |         |                          |                          |         |                  | Summary       | **                  | n.s.   | ****         |                                |      |           |      |                           |      |              |      |
| 3D   | Dinner time                     | 21.26 ± 1.139            | 21.53 ± 1.217            | 32      | 20.96 ± 1.143            | 20.3 ± .6156             | 67      | Two-way RM ANOVA | d.f.          | 1, 97               | 1, 97  | 1, 97        | 0.2969                         | n.s. | <.0001    | **** | .4725                     | n.s. | <.0001       | **** |
|      |                                 |                          |                          |         |                          |                          |         |                  | F-value       | 3.199               | 11.06  | 17.51        |                                |      |           |      |                           |      |              |      |
|      |                                 |                          |                          |         |                          |                          |         |                  | p-value       | .0768               | .0012  | <.0001       |                                |      |           |      |                           |      |              |      |
|      |                                 |                          |                          |         |                          |                          |         |                  | Summary       | n.s.                | **     | ****         |                                |      |           |      |                           |      |              |      |

|             |                          |                           |                           |                          |                           |                           |         |                     |        |        |        |        |        |        |        |       |        |        |        |      |
|-------------|--------------------------|---------------------------|---------------------------|--------------------------|---------------------------|---------------------------|---------|---------------------|--------|--------|--------|--------|--------|--------|--------|-------|--------|--------|--------|------|
| 4A          | SF-36: PF                | 98.03;<br>(96.95, 99.11)  | 98.33;<br>(97.38, 99.29)  | 33                       | 93.73;<br>(91.45, 96.01)  | 96.27;<br>(94.79, 97.75)  | 67      | Two-way<br>RM ANOVA | d.f.   | 1, 98  | 1, 98  | 1, 98  | >.9999 | n.s.   | .0020  | **    | .0055  | **     | .2940  | n.s. |
|             |                          |                           |                           |                          |                           |                           | F-value |                     | 4.769  | 6.375  | 2.951  |        |        |        |        |       |        |        |        |      |
|             |                          |                           |                           |                          |                           |                           | p-value |                     | .0314  | .0132  | .0890  |        |        |        |        |       |        |        |        |      |
|             |                          |                           |                           |                          |                           |                           | Summary |                     | *      | *      | n.s.   |        |        |        |        |       |        |        |        |      |
|             | SF-36: RLPH              | 98.49;<br>(96.34, 100.63) | 94.70;<br>(88.14, 101.26) | 33                       | 90.30;<br>(84.89, 95.71)  | 97.76;<br>(94.63, 100.90) | 67      |                     | d.f.   | 1, 98  | 1, 98  | 1, 98  | 0.7540 | n.s.   | .0288  | *     | .0464  | *      | .7856  | n.s. |
|             |                          |                           |                           |                          |                           |                           | F-value |                     | .4966  | 1.092  | 4.655  |        |        |        |        |       |        |        |        |      |
|             |                          |                           |                           |                          |                           |                           | p-value |                     | .4827  | .2985  | .0334  |        |        |        |        |       |        |        |        |      |
|             |                          |                           |                           |                          |                           |                           | Summary |                     | n.s.   | n.s.   | *      |        |        |        |        |       |        |        |        |      |
|             | SF-36: BP                | 93.64;<br>(89.86, 97.42)  | 92.73;<br>(87.2, 98.25)   | 33                       | 86.57;<br>(82.22, 90.91)  | 91.57;<br>(88.05, 95.08)  | 67      |                     | d.f.   | 1, 98  | 1, 98  | 1, 98  | >.9999 | n.s.   | .0779  | n.s.  | .0626  | n.s.   | >.9999 | n.s. |
|             |                          |                           |                           |                          |                           |                           | F-value |                     | .9674  | 2.688  | 2.017  |        |        |        |        |       |        |        |        |      |
|             |                          |                           |                           |                          |                           |                           | p-value |                     | .3278  | .1043  | .1586  |        |        |        |        |       |        |        |        |      |
|             |                          |                           |                           |                          |                           |                           | Summary |                     | n.s.   | n.s.   | n.s.   |        |        |        |        |       |        |        |        |      |
|             | SF-36: GH                | 76.06;<br>(69.58, 82.54)  | 82.27;<br>(77.05, 87.50)  | 33                       | 72.01;<br>(68.64, 75.39)  | 81.79<br>(78.78, 84.81)   | 67      | d.f.                | 1, 98  | 1, 98  | 1, 98  | 0.0263 | *      | <.0001 | ****   | .3732 | n.s.   | >.9999 | n.s.   |      |
|             |                          |                           |                           |                          |                           |                           | F-value | 28.30               | .7258  | 1.406  |        |        |        |        |        |       |        |        |        |      |
|             |                          |                           |                           |                          |                           |                           | p-value | <.0001              | .3963  | .2386  |        |        |        |        |        |       |        |        |        |      |
|             |                          |                           |                           |                          |                           |                           | Summary | ****                | n.s.   | n.s.   |        |        |        |        |        |       |        |        |        |      |
|             | SF-36: Vit               | 66.06;<br>(61.07, 71.05)  | 65.91;<br>(60.16, 71.66)  | 33                       | 55.97;<br>(51.97, 59.97)  | 68.62;<br>(64.37, 72.87)  | 67      | d.f.                | 1, 98  | 1, 98  | 1, 98  | >.9999 | n.s.   | <.0001 | ****   | .0084 | **     | .8745  | n.s.   |      |
|             |                          |                           |                           |                          |                           |                           | F-value | 11.66               | 1.552  | 12.23  |        |        |        |        |        |       |        |        |        |      |
|             |                          |                           |                           |                          |                           |                           | p-value | .0009               | .2158  | .0007  |        |        |        |        |        |       |        |        |        |      |
|             |                          |                           |                           |                          |                           |                           | Summary | ***                 | n.s.   | ***    |        |        |        |        |        |       |        |        |        |      |
|             | SF-36: SF                | 91.29;<br>(86.65, 95.92)  | 89.02;<br>(82.48, 95.55)  | 33                       | 87.68;<br>(83.233, 92.14) | 90.63;<br>(85.97, 95.28)  | 67      | d.f.                | 1, 98  | 1, 98  | 1, 98  | 0.9033 | n.s    | .3271  | n.s    | .6901 | n.s.   | >.9999 | n.s.   |      |
|             |                          |                           |                           |                          |                           |                           | F-value | .03326              | .08925 | 2.023  |        |        |        |        |        |       |        |        |        |      |
|             |                          |                           |                           |                          |                           |                           | p-value | .8557               | .7658  | .1581  |        |        |        |        |        |       |        |        |        |      |
|             |                          |                           |                           |                          |                           |                           | Summary | n.s.                | n.s.   | n.s.   |        |        |        |        |        |       |        |        |        |      |
| SF-36: RLEP | 91.92;<br>(85.99, 97.85) | 86.87;<br>(76.24, 97.50)  | 33                        | 83.58;<br>(75.41, 91.76) | 93.04;<br>(87.64, 98.43)  | 67                        | d.f.    | 1, 98               | 1, 98  | 1, 98  | 0.7519 | n.s    | .0393  | *      | .2999  | n.s.  | .5728  | n.s.   |        |      |
|             |                          |                           |                           |                          |                           | F-value                   | .4026   | .05550              | 4.371  |        |        |        |        |        |        |       |        |        |        |      |
|             |                          |                           |                           |                          |                           | p-value                   | .5272   | .8143               | .0392  |        |        |        |        |        |        |       |        |        |        |      |
|             |                          |                           |                           |                          |                           | Summary                   | n.s.    | n.s.                | *      |        |        |        |        |        |        |       |        |        |        |      |
| SF-36: EWB  | 77.94;<br>(74.36, 81.52) | 76.85;<br>(72.24, 81.46)  | 33                        | 72.93;<br>(68.74, 77.11) | 81.07;<br>(77.08, 85.07)  | 67                        | d.f.    | 1, 98               | 1, 98  | 1, 98  | >.9999 | n.s.   | .0002  | ***    | .2491  | n.s.  | .3901  | n.s.   |        |      |
|             |                          |                           |                           |                          |                           | F-value                   | 4.207   | .02041              | 7.210  |        |        |        |        |        |        |       |        |        |        |      |
|             |                          |                           |                           |                          |                           | p-value                   | .0429   | .8867               | .0085  |        |        |        |        |        |        |       |        |        |        |      |
|             |                          |                           |                           |                          |                           | Summary                   | *       | n.s.                | **     |        |        |        |        |        |        |       |        |        |        |      |
| 4B          | PSQI                     | 4.032;<br>(3.177, 4.887)  | 4.097;<br>(3.325, 4.868)  | 31                       | 5.921;<br>(5.219, 6.622)  | 3.365;<br>(2.894, 3.836)  | 63      | Two-way<br>RM ANOVA | d.f.   | 1, 92  | 1, 92  | 1, 92  | >.9999 | n.s.   | <.0001 | ****  | .0006  | ***    | .3055  | n.s. |
|             |                          |                           |                           |                          |                           |                           | F-value | 21.75               | 1.776  | 24.06  |        |        |        |        |        |       |        |        |        |      |
|             |                          |                           |                           |                          |                           |                           | p-value | <.0001              | .1860  | <.0001 |        |        |        |        |        |       |        |        |        |      |
|             |                          |                           |                           |                          |                           |                           | Summary | ****                | n.s.   | ****   |        |        |        |        |        |       |        |        |        |      |
|             | IDS-SR                   | 8.818;<br>(6.621, 11.016) | 7.121;<br>(5.312, 8.931)  | 33                       | 12.94;<br>(10.86, 15.02)  | 7.662;<br>(5.887, 9.436)  | 66      | Two-way<br>RM ANOVA | d.f.   | 1, 96  | 1, 96  | 1, 96  | 0.3229 | n.s    | <.0001 | ****  | .0155  | *      | >.9999 | n.s. |
|             |                          |                           |                           |                          |                           |                           | F-value | 22.30               | 3.019  | 5.877  |        |        |        |        |        |       |        |        |        |      |
|             |                          |                           |                           |                          |                           |                           | p-value | <.0001              | .0855  | .0172  |        |        |        |        |        |       |        |        |        |      |
|             |                          |                           |                           |                          |                           |                           | Summary | ****                | n.s.   | *      |        |        |        |        |        |       |        |        |        |      |
|             | SWE                      | 32.70;<br>(31.28, 34.12)  | 33.21;<br>(31.99, 34.43)  | 33                       | 30.87;<br>(29.79, 31.94)  | 32.46;<br>(31.36, 33.57)  | 67      | Two-way<br>RM ANOVA | d.f.   | 1, 98  | 1, 98  | 1, 98  | .7093  | n.s.   | .0002  | ***   | .0873  | n.s.   | .8140  | n.s. |
|             |                          |                           |                           |                          |                           |                           | F-value | 9.741               | 2.382  | 2.556  |        |        |        |        |        |       |        |        |        |      |
|             |                          |                           |                           |                          |                           |                           | p-value | .0024               | .1259  | .1131  |        |        |        |        |        |       |        |        |        |      |
|             |                          |                           |                           |                          |                           |                           | Summary | **                  | n.s.   | n.s.   |        |        |        |        |        |       |        |        |        |      |
|             | MCTQ                     | 3.802;<br>(3.37, 4.234)   | 3.720;<br>(3.223, 4.217)  | 32                       | 3.746;<br>(3.465, 4.026)  | 3.828;<br>(3.542, 4.114)  | 66      | Two-way<br>RM ANOVA | d.f.   | 1, 98  | 1, 98  | 1, 98  | >.9999 | n.s.   | .8189  | n.s.  | >.9999 | n.s.   | >.9999 | n.s. |
|             |                          |                           |                           |                          |                           |                           | F-value | 1.85e <sup>-6</sup> | .01149 | .8940  |        |        |        |        |        |       |        |        |        |      |
|             |                          |                           |                           |                          |                           |                           | p-value | .9989               | .9149  | .3468  |        |        |        |        |        |       |        |        |        |      |
|             |                          |                           |                           |                          |                           |                           | Summary | n.s.                | n.s.   | n.s.   |        |        |        |        |        |       |        |        |        |      |

SD = Standard deviation

RM = Repeated Measure

n.s. = not significant

PF = Physical functioning

BP = Bodily pain

VT = Vitality

RE = Role of limitation emotional Problems

PSQI = Pittsburgh Sleep Quality Index

SWE = Scale of General Expectations of self-efficacy

CG = Control Group, EG = Experimental Group

d.f. = degree of freedom

SF-36 = Short Form 36 Health Survey Questionnaire

RP = Role of limitation physical functioning

GH = General Health

SF = Social functioning

EWB = Emotional well-being

IDS-SR = Self-Assessment Inventory of Depressive Symptoms

MCTQ = Munich Chronotype Questionnaire

MTVS = Mealtime Variability Score

**Table S4:** Statistical data from the development of normalized body weight and BMI of participants during the exploration and the intervention phase, and of follow-up data of continuing and discontinuing participants. At T3, three participants could no longer be reached, which is why the n-number deviates here. The data in the table refers to the data shown in Figures 1E and S2A.

| Fig. | Variable | Group | Variable values (mean ± SD) |                 |                |                | n-value | Statistical test | d.f.  | F/t-value | Significance |         | Bonferroni post-hoc |      |           |      |           |      |
|------|----------|-------|-----------------------------|-----------------|----------------|----------------|---------|------------------|-------|-----------|--------------|---------|---------------------|------|-----------|------|-----------|------|
|      |          |       | Baseline T0                 | Explor. end T1  | Interv. end T2 | Follow-up T3   |         |                  |       |           |              |         | T0 vs. T1           |      | T1 vs. T2 |      | T2 vs. T3 |      |
|      |          |       |                             |                 |                |                |         |                  |       |           | p-value      | Summary | p-val.              | Sum. | p-val.    | Sum. | p-val.    | Sum. |
| 1E   | BW       | CG    | .0 ± .0                     | -.1697 ± .9777  | -.5606 ± 1.720 |                | 33      | RM 1-way-ANOVA   | 2, 32 | 2.69      | .0918        | n.s.    | .6524               | n.s. | .2734     | n.s. | .9787     | n.s. |
|      |          | EG    | .0 ± .0                     | -.2104 ± 1.048  | -2.621 ± 2.226 |                | 67      |                  | 2, 66 | 83.76     | <.0001       | ****    | .2099               | n.s. | <.0001    | **** |           |      |
|      | BW_c     | EG    |                             |                 | -3.379 ± 2.100 | -4.500 ± 2.696 | 34      | paired t-test    | 33    | 6.369     | <.0001       | ****    |                     |      |           |      |           |      |
|      | BW_d     |       |                             |                 | -2.077 ± 2.110 | -1.597 ± 2.152 | 30      |                  | 29    | 3.487     | .0016        | °°      |                     |      |           |      |           |      |
| S2B  | BMI      | CG    | .0 ± .0                     | -.06364 ± .3219 | -.1970 ± .5537 |                | 33      | RM 1-way-ANOVA   | 2, 32 | 3.12      | .0658        | n.s.    | .5292               | n.s. | .2418     | n.s. | .9524     | n.s. |
|      |          | EG    | .0 ± .0                     | -.0620 ± .3446  | -.8663 ± .7376 |                | 67      |                  | 2, 66 | 83.75     | <.0001       | ****    | .2913               | n.s. | <.0001    | **** |           |      |
|      | BMI_c    | EG    |                             |                 | -1.244 ± .6465 | -1.728 ± .7676 | 34      | paired t-test    | 33    | 6.072     | <.0001       | ****    |                     |      |           |      |           |      |
|      | BMI_d    |       |                             |                 | -.7033 ± .7289 | -.5392 ± .7147 | 30      |                  | 29    | 3.433     | .0018        | °°      |                     |      |           |      |           |      |

SD = Standard deviation  
 CG = Control Group, EG = Experimental Group  
 BW = body weight  
 BMI = Body mass index  
 RM = Repeated Measure  
 \_c = continuing  
 \_d = discontinuing  
 d.f. = degree of freedom  
 n.s. = not significant

**Table S5:** Statistical data from the development of normalized body weight and BMI of participants at the different phases of the study. At T3 only continuing participants were included, which is why the n-number deviates here from the other time points. The data in the table refers to the data shown in Figures 1F, S2C, and S2G.

| Fig. | Body weight change (mean ± SD) |         |              |         |                 |         |                  |         |                  |         |                   |         |                  |         |                   |         | Statistica<br>l test       | ANOVA<br>results           | Source of Variation |        |                 | Bonferroni post-hoc |                                               |        |      |        |      |  |
|------|--------------------------------|---------|--------------|---------|-----------------|---------|------------------|---------|------------------|---------|-------------------|---------|------------------|---------|-------------------|---------|----------------------------|----------------------------|---------------------|--------|-----------------|---------------------|-----------------------------------------------|--------|------|--------|------|--|
|      | T0                             |         |              |         | T1              |         |                  |         | T2               |         |                   |         | T3               |         |                   |         |                            |                            | Time                | Group  | Time x<br>Group | T1                  |                                               | T2     |      | T3     |      |  |
|      | CG                             | n-value | EG           | n-value | CG              | n-value | EG               | n-value | CG               | n-value | EG                | n-value | CG               | n-value | EG                | n-value |                            |                            |                     |        |                 | p-val.              | Sum.                                          | p-val. | Sum. | p-val. | Sum. |  |
| 1F   | .00<br>± .00                   | 33      | .00<br>± .00 | 67      | -.170<br>± .978 | 33      | -.210<br>± 1.048 | 67      | -.561<br>± 1.720 | 33      | -2.621<br>± 2.226 | 67      | -.796<br>± 1.992 | 26      | -4.500<br>± 2.696 | 34      | Mixed-<br>effects<br>model | d.f.                       | 1.6, 131.6          | 1, 98  | 3, 254          | >.9999              | n.s.                                          | <.0001 | **** | <.0001 | **** |  |
| S2C  | .00<br>± .00                   | 33      | .00<br>± .00 | 67      | -.064<br>± .322 | 33      | -.060<br>± .346  | 67      | -.197<br>± .554  | 33      | -.875<br>± .735   | 67      | -.273<br>± .640  | 26      | -1.479<br>± .865  | 34      |                            | Mixed-<br>effects<br>model | F-value             | 61.18  | 35.51           | 29.56               | >.9999   n.s.   <.0001   ****   <.0001   **** |        |      |        |      |  |
|      |                                |         |              |         |                 |         |                  |         |                  |         |                   |         |                  |         |                   |         |                            |                            | p-value             | <.0001 | <.0001          | <.0001              |                                               |        |      |        |      |  |
|      |                                |         |              |         |                 |         |                  |         |                  |         |                   |         |                  |         |                   |         |                            |                            | Summary             | ****   | ****            | ****                |                                               |        |      |        |      |  |
| S2G  | .00<br>± .00                   | 33      | .00<br>± .00 | 67      | -.170<br>± .978 | 33      | -.210<br>± 1.048 | 67      | -.367<br>± 1.58  | 42      | -2.270<br>± 2.22  | 79      |                  |         |                   |         | Mixed-<br>effects<br>model | d.f.                       | 1.4, 137.9          | 1, 119 | 2, 196          | >.9999              | n.s.                                          | <.0001 | **** |        |      |  |
|      |                                |         |              |         |                 |         |                  |         |                  |         |                   |         |                  |         |                   |         |                            | F-value                    | 35.35               | 11.14  | 19.62           |                     |                                               |        |      |        |      |  |
|      |                                |         |              |         |                 |         |                  |         |                  |         |                   |         |                  |         |                   |         |                            | p-value                    | <.0001              | .0011  | <.0001          |                     |                                               |        |      |        |      |  |
|      | .00<br>± .00                   | 33      | .00<br>± .00 | 67      | -.064<br>± .322 | 33      | -.060<br>± .346  | 67      | -.13<br>± .513   | 42      | -.759<br>± .735   | 79      |                  |         |                   |         | Mixed-<br>effects<br>model | d.f.                       | 1.4, 138            | 1, 119 | 2, 196          | >.9999              | n.s.                                          | <.0001 | **** |        |      |  |
|      |                                |         |              |         |                 |         |                  |         |                  |         |                   |         |                  |         |                   |         |                            | F-value                    | 36.63               | 10.88  | 20.17           |                     |                                               |        |      |        |      |  |
|      |                                |         |              |         |                 |         |                  |         |                  |         |                   |         |                  |         |                   |         |                            | p-value                    | <.0001              | .0013  | <.0001          |                     |                                               |        |      |        |      |  |
|      |                                |         |              |         |                 |         |                  |         |                  |         |                   |         |                  |         |                   |         | Summary                    | ****                       | **                  | ****   |                 |                     |                                               |        |      |        |      |  |

SD = Standard deviation  
CG = Control Group, EG = Experimental Group  
d.f. = degree of freedom  
n.s. = not significant

**Table S6:** Statistical data from all simple regression. The data in the table refers to the data shown in Figs. 3A, B, and C. In data for Figures 2B, D, and S2H, Some participants were excluded from this analysis because of several probably erroneous diary entries about unrealistic amounts of food. In data for Figures 3B-D, varying n-numbers result from incomplete entries in the diaries. In date for Figures 3E, G, J, and S2I, missing n-numbers are due to incomplete diary entries on weekends during the exploratory phase or because participants usually did not have a particular meal.

| Fig. | Group | Variables                                | n-<br>value                | Statistical test  | Slope ± SD                                   | R <sup>2</sup>   | Is the slope significantly non-zero? |          |         |         |      |
|------|-------|------------------------------------------|----------------------------|-------------------|----------------------------------------------|------------------|--------------------------------------|----------|---------|---------|------|
|      |       |                                          |                            |                   |                                              |                  | F-value                              | d.f.     | p-value | Summary |      |
| 1G   | CG    | Δ MTVS vs. Δ body weight                 | 33                         | Linear Regression | -.03350 ± .3929                              | .0002345         | .007273                              | 1, 31    | .9326   | n.s.    |      |
|      |       | Δ MTVS vs. Δ BMI                         | 33                         |                   | -.06239 ± .1099                              | .01029           | .5743                                | 1, 31    | .5743   | n.s.    |      |
|      | EG    | Δ MTVS vs. Δ body weight                 | 67                         |                   | .8064 ± .2802                                | .1130            | 8.284                                | 1, 65    | .0054   | **      |      |
|      |       | Δ MTVS vs. Δ BMI                         | 67                         |                   | .2763 ± .09323                               | .1190            | 8.782                                | 1, 65    | .0042   | **      |      |
| S2H  | EG    | Δ MTVS Breakfast vs. body weight         | 67                         | Linear Regression | -.1995 ± .1439                               | .02874           | 1.923                                | 1, 65    | .1702   | n.s.    |      |
|      |       | Δ MTVS Breakfast vs. BMI                 | 67                         |                   | -.07272 ± .04790                             | .03425           | 2.305                                | 1, 65    | .1338   | n.s.    |      |
|      |       | Δ MTVS Lunch vs. body weight             | 67                         |                   | .6103 ± .2122                                | .1192            | 8.273                                | 1, 65    | .0054   | **      |      |
|      |       | Δ MTVS Lunch vs. BMI                     | 67                         |                   | .2050 ± .07080                               | .1142            | 8.380                                | 1, 65    | .0052   | **      |      |
|      |       | Δ MTVS Dinner vs. body weight            | 67                         |                   | .5944 ± .2036                                | .1159            | 8.520                                | 1, 65    | .0048   | **      |      |
|      |       | Δ MTVS Dinner vs. BMI                    | 67                         |                   | .2067 ± .06762                               | .1257            | 9.342                                | 1, 65    | .0032   | **      |      |
| S2I  | EG    | Baseline BMI vs. Δ BMI                   | 67                         | Linear Regression | -.03515 ± .01779                             | .05974           | 4.130                                | 1, 65    | .0465   | *       |      |
| 2C   | CG    | Δ KJ intake vs. Δ body weight            | 30                         | Linear Regression | 6.526e <sup>-5</sup> ± .0003174              | .0001508         | .04228                               | 1, 28    | .8386   | n.s.    |      |
|      |       | Δ KJ intake vs. Δ BMI                    | 30                         |                   | 1.302e <sup>-5</sup> ± .0001046              | .0005529         | .01549                               | 1, 28    | .9018   | n.s.    |      |
|      | EG    | Δ KJ intake vs. Δ body weight            | 67                         |                   | -4.326e <sup>-5</sup> ± .00022               | .0005975         | .03886                               | 1, 65    | .8443   | n.s.    |      |
|      |       | Δ KJ intake vs. Δ BMI                    | 67                         |                   | -3.172e <sup>-5</sup> ± 7.319e <sup>-5</sup> | .002881          | .1878                                | 1, 65    | .6662   | n.s.    |      |
| S2L  | CG    | KJ Exploration vs. KJ Intervention       | 30                         | Linear Regression | .8787 ± .1271                                | .6305            | 47,78                                | 1, 28    | <.0001  | ****    |      |
|      | EG    |                                          | 67                         |                   | .7094 ± .06780±                              | .6275            | 109,5                                | 1, 65    | <.0001  | ****    |      |
| 2D   | CG    | Δ cumulative KJ intake vs. Δ body weight | 30                         | Linear Regression | 1.205e <sup>-6</sup> ± 7.270e <sup>-6</sup>  | .0009794         | .02745                               | 1, 28    | .8696   | n.s.    |      |
|      |       | Δ cumulative KJ intake vs. Δ BMI         | 30                         |                   | 2.604e <sup>-7</sup> ± 2.395e <sup>-6</sup>  | .0004219         | .01182                               | 1, 28    | .9142   | n.s.    |      |
|      | EG    | Δ cumulative KJ intake vs. Δ body weight | 67                         |                   | -1.627e <sup>-6</sup> ± 5.237e <sup>-6</sup> | .001483          | .09655                               | 1, 65    | .7570   | n.s.    |      |
|      |       | Δ cumulative KJ intake vs. Δ BMI         | 67                         |                   | -9.296e <sup>-7</sup> ± 1.746e <sup>-5</sup> | .004341          | .2834                                | 1, 65    | .5963   | n.s.    |      |
| 2F   | CG    | Fat                                      | Δ intake vs. Δ body weight | 30                | Linear Regression                            | -.02193 ± .2513  | .0002719                             | .007615  | 1, 28   | .9311   | n.s. |
|      |       |                                          | Δ intake vs. Δ BMI         | 30                |                                              | -.001989± .08280 | 2.062e <sup>-5</sup>                 | .0005774 | 1, 28   | .9810   | n.s. |
|      | EG    | Fat                                      | Δ intake vs. Δ body weight | 67                |                                              | .07281 ± .1600   | .003176                              | .2071    | 1, 65   | .6506   | n.s. |
|      |       |                                          | Δ intake vs. Δ BMI         | 67                |                                              | .02129 ± .05344  | .002436                              | .1587    | 1, 65   | .6916   | n.s. |
|      | CG    | Carb                                     | Δ intake vs. Δ body weight | 30                |                                              | -.03933 ± .1090  | .004631                              | .1303    | 1, 28   | .7209   | n.s. |
|      |       |                                          | Δ intake vs. Δ BMI         | 30                |                                              | -.01866 ± .03580 | .009609                              | .2717    | 1, 28   | .6063   | n.s. |
|      | EG    | Carb                                     | Δ intake vs. Δ body weight | 67                |                                              | -.1421 ± .08956  | .03728                               | 2,517    | 1, 65   | .1175   | n.s. |
|      |       |                                          | Δ intake vs. Δ BMI         | 67                |                                              | -.04338 ± .03000 | .03116                               | 2,091    | 1, 65   | .1530   | n.s. |
|      | CG    | Prot                                     | Δ intake vs. Δ body weight | 30                |                                              | .02385 ± .2127   | .0004489                             | .01257   | 1, 28   | .9115   | n.s. |
|      |       |                                          | Δ intake vs. Δ BMI         | 30                |                                              | .02433 ± .06992  | .004307                              | .1211    | 1, 28   | .7304   | n.s. |
|      | EG    | Prot                                     | Δ intake vs. Δ body weight | 67                |                                              | -.3055 ± .1843   | .04054                               | 2,747    | 1, 65   | .1023   | n.s. |
|      |       |                                          | Δ intake vs. Δ BMI         | 67                |                                              | -.1050 ± .06147  | .04293                               | 2,916    | 1, 65   | .0925   | n.s. |

|     |    |                                       |                                     |    |                   |                                |          |         |       |                  |      |
|-----|----|---------------------------------------|-------------------------------------|----|-------------------|--------------------------------|----------|---------|-------|------------------|------|
| S2N | CG | Fat                                   | Δ intake vs. Δ body weight          | 30 | Linear Regression | $-.000138 \pm .000476$         | .002939  | .08254  | 1, 28 | .7760            | n.s. |
|     |    |                                       | Δ intake vs. Δ BMI                  | 30 |                   | $-3.246e^{-5} \pm .000157$     | .001526  | .04279  | 1, 28 | .8376            | n.s. |
|     |    |                                       | Δ intake vs. Δ body weight          | 67 |                   | $-8.216e^{-5} \pm .000319$     | .001021  | .06640  | 1, 65 | .7975            | n.s. |
|     |    |                                       | Δ intake vs. Δ BMI                  | 67 |                   | $-4.923e^{-5} \pm .000106$     | .003286  | .2143   | 1, 65 | .6450            | n.s. |
|     | EG | Carb                                  | Δ intake vs. Δ body weight          | 30 |                   | $9.359e^{-5} \pm .000181$      | .008762  | .2475   | 1, 28 | .6227            | n.s. |
|     |    |                                       | Δ intake vs. Δ BMI                  | 30 |                   | $1.814e^{-5} \pm 6.214e^{-5}$  | .003034  | .08522  | 1, 28 | .7725            | n.s. |
|     |    |                                       | Δ intake vs. Δ body weight          | 67 |                   | $-.000212 \pm .000141$         | .03345   | 2.249   | 1, 65 | .1385            | n.s. |
|     |    |                                       | Δ intake vs. Δ BMI                  | 67 |                   | $-7.545e^{-5} \pm 4.712e^{-5}$ | .03796   | 2.565   | 1, 65 | .1141            | n.s. |
|     | CG | Prot                                  | Δ intake vs. Δ body weight          | 30 | Linear Regression | $-.000119 \pm .000666$         | .001131  | .03170  | 1, 28 | .8600            | n.s. |
|     |    |                                       | Δ intake vs. Δ BMI                  | 30 |                   | $3.299e^{-5} \pm .000219$      | .0008070 | .02261  | 1, 28 | .8815            | n.s. |
|     |    |                                       | Δ intake vs. Δ body weight          | 67 |                   | $-.000806 \pm .000449$         | .04714   | 3.216   | 1, 65 | .0776            | n.s. |
|     |    |                                       | Δ intake vs. Δ BMI                  | 67 |                   | $-.000281 \pm .000150$         | .05154   | 3.532   | 1, 65 | .0647            | n.s. |
|     | EG |                                       | Δ intake vs. Δ body weight          | 67 |                   |                                |          |         |       |                  |      |
|     |    |                                       | Δ intake vs. Δ BMI                  | 67 |                   |                                |          |         |       |                  |      |
|     |    |                                       | Δ intake vs. Δ body weight          | 67 |                   |                                |          |         |       |                  |      |
|     |    |                                       | Δ intake vs. Δ BMI                  | 67 |                   |                                |          |         |       |                  |      |
| 3B  | CG |                                       | Δ 95%ile interval vs. Δ body weight | 32 | Linear Regression | $.2213 \pm .1476$              | .06972   | 2.248   | 1, 30 | .1442            | n.s. |
|     |    |                                       | Δ 95%ile interval vs. Δ BMI         | 32 |                   | $.04259 \pm .04231$            | .03268   | 1.013   | 1, 30 | .3221            | n.s. |
|     | EG |                                       | Δ 95%ile interval vs. Δ body weight | 67 |                   | $-.04842 \pm .1218$            | .002426  | .1581   | 1, 65 | .6922            | n.s. |
|     |    |                                       | Δ 95%ile interval vs. Δ BMI         | 67 |                   | $-.02160 \pm .04063$           | .004328  | .2825   | 1, 65 | .5968            | n.s. |
| 3C  | CG |                                       | Δ Breakfast time vs. Δ body weight  | 33 | Linear Regression | $.05080 \pm .2608$             | .001223  | .03794  | 1, 31 | .8468            | n.s. |
|     |    |                                       | Δ Breakfast time vs. Δ BMI          | 33 |                   | $-.007265 \pm .07335$          | .0003164 | .009811 | 1, 31 | .9217            | n.s. |
|     | EG |                                       | Δ Breakfast time vs. Δ body weight  | 67 |                   | $.1142 \pm .1833$              | .005937  | .3882   | 1, 65 | .5354            | n.s. |
|     |    |                                       | Δ Breakfast time vs. Δ BMI          | 67 |                   | $.03573 \pm .06123$            | .005210  | .3404   | 1, 65 | .5616            | n.s. |
| 3D  | CG |                                       | Δ Dinner time vs. Δ body weight     | 32 | Linear Regression | $.3149 \pm .3682$              | .02380   | .7313   | 1, 31 | .3992            | n.s. |
|     |    |                                       | Δ Dinner time vs. Δ BMI             | 32 |                   | $-.01494 \pm .1047$            | .0006776 | .02034  | 1, 31 | .8875            | n.s. |
|     | EG |                                       | Δ Dinner time vs. Δ body weight     | 67 |                   | $-.1096 \pm .2361$             | .003308  | .2157   | 1, 65 | .6439            | n.s. |
|     |    |                                       | Δ Dinner time vs. Δ BMI             | 67 |                   | $-.05984 \pm .07860$           | .008838  | .5796   | 1, 65 | .4492            | n.s. |
| 3E  | EG | midsleep Phase vs. midEat Phase       | Exploration weekend                 | 65 | Linear Regression | $.5902 \pm .1449$              | .2084    | 16.58   | 1, 63 | <b>.0001</b>     | **** |
|     |    |                                       | Intervention                        | 65 |                   | $.6532 \pm .1176$              | .3286    | 30.83   | 1, 63 | <b>&lt;.0001</b> | **** |
| 3G  | EG | Δ Residuals vs. Δ BMI                 | mSP-mEP relation                    | 65 | Linear Regression | $-.2522 \pm .09116$            | .1084    | 7.656   | 1, 63 | <b>.0074</b>     | **   |
| 3J  | EG | Correction of weekend meals vs. Δ BMI | Breakfast                           | 55 | Linear Regression | $.1427 \pm .08443$             | .05114   | 2.856   | 1, 53 | .0969            | n.s. |
|     |    |                                       | Lunch                               | 64 |                   | $.0460 \pm .06415$             | .008225  | .5142   | 1, 62 | .4760            | n.s. |
|     |    |                                       | Dinner                              | 63 |                   | $-.2490 \pm .08055$            | .1355    | 9.558   | 1, 61 | <b>.0030</b>     | **   |
| S2O | EG | Dev. weekend and scheduled meals      | Breakfast                           | 55 | Linear Regression | $-.1174 \pm .1031$             | .02391   | 1.298   | 1, 53 | .2597            | n.s. |
|     |    |                                       | Lunch                               | 64 |                   | $-.1409 \pm .08067$            | .04690   | 3.051   | 1, 62 | .0857            | n.s. |
|     |    |                                       | Dinner                              | 63 |                   | $-.03707 \pm .1313$            | .001305  | .07969  | 1, 61 | .7787            | n.s. |
| S2L | CG | KJ Exploration vs. KJ Intervention    |                                     | 30 | Linear Regression | $.8787 \pm .1271$              | .6305    | 47.78   | 1, 28 | <b>&lt;.0001</b> | **** |
|     | EG |                                       |                                     | 67 |                   | $.7094 \pm .06780 \pm$         | .6275    | 109.5   | 1, 65 | <b>&lt;.0001</b> | **** |

BMI = Body mass index

CG = Control Group, EG = Experimental Group

MTVS = Mealtime Variability Score

d.f. = degree of freedom

n.s. = not significant



**Table S7:** Association of weekly MTVS with weekly weight loss. The table shows the weekly weight change of all participants during the exploration and the intervention phase while adhering to certain MTVSs in each week. 1-way ANOVA with Bonferroni post-hoc test comparing the mean of each row with the mean of the first row, \*  $p \leq 0.05$ .

| Weekly MTVS | Corresponding time window (min) | Weekly weight change (kg) | SD     | n-value | Sig. difference from MTVS =1 |
|-------------|---------------------------------|---------------------------|--------|---------|------------------------------|
| = 1         | ≤ 30                            | -0.47                     | 0.1995 | 50      |                              |
| ≤ 2         | ≤ 60                            | -0.39                     | 0.5144 | 318     | n.s.                         |
| ≤ 3         | ≤ 90                            | -0.38                     | 0.5881 | 426     | n.s.                         |
| > 3         | > 90                            | -0.12                     | 0.5415 | 280     | *                            |
| > 4         | > 120                           | -0.10                     | 0.4035 | 137     | *                            |

**Table S8:** Statistical data from BMI changes depending of the baseline BMI of each participant. The data in the table refers to the data shown in Figure S2J.

| Fig. | BMI change (mean ± SD) |         |                 |         |                 |         |                 |         |                 |         |                 |         | Statistical test | ANOVA results | Source of Variation |        |        | Bonferroni post-hoc |                |           |      |        |      |
|------|------------------------|---------|-----------------|---------|-----------------|---------|-----------------|---------|-----------------|---------|-----------------|---------|------------------|---------------|---------------------|--------|--------|---------------------|----------------|-----------|------|--------|------|
|      | 20.0-24.9              |         |                 |         | 25.0-29.9       |         |                 |         | >30             |         |                 |         |                  |               |                     |        |        | 20.0-24.9           |                | 25.0-29.9 |      | >30    |      |
|      | CG                     | n-value | EG              | n-value | CG              | n-value | EG              | n-value | CG              | n-value | EG              | n-value |                  |               |                     |        | Weight | Group               | Weight x Group | p-val.    | Sum. | p-val. | Sum. |
| S2J  | -.018<br>± .396        | 17      | -.742<br>± .546 | 26      | -.255<br>± .468 | 11      | -.776<br>± .709 | 24      | -.304<br>± .728 | 5       | -.951<br>± .804 | 17      | 2-way ANOVA      | d.f.          | 2, 94               | 1, 94  | 2, 94  | <.0001              | ***            | .0694     | n.s. | .1295  | n.s. |
|      |                        |         |                 |         |                 |         |                 |         |                 |         |                 |         |                  | F-value       | 1.012               | 19.03  | .2299  |                     |                |           |      |        |      |
|      |                        |         |                 |         |                 |         |                 |         |                 |         |                 |         |                  | p-value       | .3673               | <.0001 | .7950  |                     |                |           |      |        |      |
|      |                        |         |                 |         |                 |         |                 |         |                 |         |                 |         |                  | Summary       | n. s.               | ****   | n. s.  |                     |                |           |      |        |      |

SD = Standard deviation  
 CG = Control Group, EG = Experimental Group  
 d.f. = degree of freedom  
 n.s. = not significant

**Table S9:** Statistical data from multiple regression analysis testing the effects of different variables while keeping the others constant. The data in the table refers to the data shown in Figures 1H and 3K.

| Fig. | Model summary  |       | Model                 |                    | Coefficients        |                       |                      |             |       |              |         |
|------|----------------|-------|-----------------------|--------------------|---------------------|-----------------------|----------------------|-------------|-------|--------------|---------|
|      |                |       | Analysis of Variance  | F (DFn, DFd)       | Parameter estimates | Variable              | Estimate             | Stand. Err. | t     | P value      | Summary |
| 1H   | R <sup>2</sup> | .1518 | Regression            | F (2, 64) = 5.729  | $\beta_0$           | Intercept             | .7183                | .5139       | 1,398 | .1670        | n.s.    |
|      |                |       | D_MTVS                | F (1, 64) = 6.949  | $\beta_1$           | D_MTVS                | .2438                | .09248      | 2,636 | <b>.0105</b> | *       |
|      |                |       | Pre_BMI               | F (1, 64) = 4.439  | $\beta_2$           | Pre_BMI               | -.03588              | .01703      | 2,107 | <b>.0391</b> | *       |
| 3K   | R <sup>2</sup> | .3970 | Regression            | F (6, 45) = 4.939  | $\beta_0$           | Intercept             | -.1691               | .2434       | .6947 | .4908        | n.s.    |
|      |                |       | D_MTVS                | F (1, 45) = 5.977  | $\beta_1$           | D_MTVS                | .2582                | .1056       | 2,445 | <b>.0185</b> | *       |
|      |                |       | D_KJ                  | F (1, 45) = .1534  | $\beta_2$           | D_KJ                  | 2,783 <sup>e-5</sup> | 7,105e-005  | .3917 | .6971        | n.s.    |
|      |                |       | Delta Intake Interval | F (1, 45) = 0.6980 | $\beta_3$           | Delta Intake Interval | -.04606              | .05513      | .8355 | .4079        | n.s.    |
|      |                |       | Delta Residuals       | F (1, 45) = 3.232  | $\beta_4$           | Delta Residuals       | -.2217               | .1233       | 1,798 | .0789        | n.s.    |
|      |                |       | Breakfast Jetlag      | F (1, 45) = 3.012  | $\beta_5$           | Breakfast Jetlag      | .1457                | .08395      | 1,736 | .0895        | n.s.    |
|      |                |       | Dinner Jetlag         | F (1, 45) = 13.01  | $\beta_6$           | Dinner Jetlag         | -.3071               | .08513      | 3,608 | <b>.0008</b> | ***     |

BMI = Body mass index  
MTVS = Mealtime variability score  
d.f. = degree of freedom  
Reg. Coeff = Regression coefficient  
Std. Err. = Standard error

**Table S10:** Statistical data from Rayleigh’s uniformity test analyzing phase distribution from the relation between midSleep Phase and midEat Phase. Missing n-numbers are due to incomplete diary entries on weekends during the exploratory phase. The data in the table refers to the data shown in Fig. 3F.

| Fig. | Data set            | Normalized midSleep Phase | Normalized midEat Phase |         |               |                  |                    | n-value |
|------|---------------------|---------------------------|-------------------------|---------|---------------|------------------|--------------------|---------|
|      |                     |                           | Relative Phase          | SD      | Vector length | Rayleigh Z-value | p-value            |         |
| 3F   | Exploration weekend | .00                       | 11.33                   | 20.653° | .937          | 57.093           | <1e <sup>-12</sup> | 65      |
|      | Intervention        | .00                       | 10.57                   | 17.221° | .956          | 60.299           | <1e <sup>-12</sup> | 65      |

SD = Standard deviation

**Table S11:** Statistical data on shifts in weekend eating times caused by the change to calculated eating times in the intervention phase. Missing n-numbers are due to incomplete diary entries on weekends during the exploratory phase or because participants usually did not have a particular meal. The data in the table refers to the data shown in Fig. 3I.

| Fig. | Meal      | Variable value (mean $\pm$ SD) |                          | n-value | Statistical test | d.f. | t-value  | Significance     |         |
|------|-----------|--------------------------------|--------------------------|---------|------------------|------|----------|------------------|---------|
|      |           | Exploration phase T0-T1        | Intervention phase T1-T2 |         |                  |      |          | p-value          | Summary |
| 3I   | Breakfast | .0 $\pm$ .0                    | -.6477 $\pm$ 1.120       | 55      | paired t-test    | 54   | 4.288    | <b>&lt;.0001</b> | ****    |
|      | Lunch     | .0 $\pm$ .0                    | -.6384 $\pm$ 1.346       | 64      |                  | 63   | 3.796    | <b>.0003</b>     | ***     |
|      | Dinner    | .0 $\pm$ .0                    | -.0002648 $\pm$ 1.013    | 63      |                  | 62   | .0002648 | .9984            | n.s.    |

SD = Standard deviation

d.f. = degree of freedom

n.s. = not significant

**Table S12:** Questionnaires collected at To and T2 to assess general well-being of participants.

| Construct           | Questionnaire                                             | Components                                                                                                                                                                                                                                                                                                                                 |
|---------------------|-----------------------------------------------------------|--------------------------------------------------------------------------------------------------------------------------------------------------------------------------------------------------------------------------------------------------------------------------------------------------------------------------------------------|
| Sleep Quality       | Pittsburgh Sleep Quality Index (PSQI)                     | Subjective sleep quality, sleep latency, sleep duration, habitual sleep efficiency, sleep disturbances, daytime impairment.                                                                                                                                                                                                                |
| Physical Well-Being | 36-Item Short Form Health Survey (SF-36)                  | Vitality, physical functionality, physical pain, general health perception, physical role function, emotional role function, social function, mental well-being.                                                                                                                                                                           |
| Self-Efficacy       | Scale of General Expectations of Self-Efficacy (SWE)      | Optimistic competence expectation, daring to solve life problems independently, attribution of success to own competences.                                                                                                                                                                                                                 |
| Depressive Mood     | Self-Assessment Inventory of Depressive Symptoms (IDS-SR) | Sleep quality, mood, appetite, weight changes, concentration/decision making, self-esteem, future expectations, suicidal thoughts, activities, energy levels, pleasure/joy, sexual interest, slowing down, restlessness, physical/vegetative complaints, panic/anxiety, digestive problems, interpersonal sensitivity, physical heaviness. |
| Chronotype          | Munich Chronotype Questionnaire (MCTQ)                    | Bedtimes, sleep times, energy levels, exposure to natural light, differences between weekdays and weekends.                                                                                                                                                                                                                                |
